# Supplementary material for: The N(2D) + CH2CHCN (Vinyl Cyanide) Reaction: A Combined Crossed Molecular Beam and Theoretical Study and Implications for the Atmosphere of Titan
Source: PubMed Central journal article supplement (PMC9483977; doi:10.1021/acs.jpca.2c04263), 2022-09-02
Supplement: jp2c04263_si_001.pdf [file jp2c04263_si_001.pdf]

The N(<sup>2</sup>D) + CH<sub>2</sub>CHCN (Vinyl Cyanide)  
Reaction: A Combined Crossed Molecular  
Beam and Theoretical Study and Implications  
for the Atmosphere of Titan

Gianmarco Vanuzzo,<sup>a</sup> Demian Marchione,<sup>a</sup> Luca Mancini,<sup>a</sup> Pengxiao Liang,<sup>a</sup> Giacomo Pannacci,<sup>a</sup> Pedro Recio,<sup>a</sup>, Yuxin Tan,<sup>a</sup> Marzio Rosi,<sup>b</sup> Dimitrios Skouteris,<sup>c</sup> Piergiorgio Casavecchia,<sup>a\*</sup> and Nadia Balucani<sup>a\*</sup>

<sup>a</sup> Dipartimento di Chimica, Biologia e Biotecnologie, Università degli Studi di Perugia, 06123  
Perugia, Italy

<sup>b</sup> Dipartimento di Ingegneria Civile e Ambientale, Università degli Studi di Perugia, 06100 Perugia,  
Italy

<sup>c</sup> Master-Tec srl, Via Sicilia 41, 06128 Perugia, Italy

**Table S1:** List of all possible exothermic combinations of products identified for the  $N(^2D) + CH_2CHCN$  reaction, determined at the CCSD(T)/aug-cc-pVTZ//B3LYP/aug-cc-pVTZ level of theory.

|                     |               |                      |               |
|---------------------|---------------|----------------------|---------------|
| $N(^2D) + CH_2CHCN$ | $\rightarrow$ | $^1c-C_3H_2N_2 + H$  | - 0.04 kJ/mol |
|                     | $\rightarrow$ | $^1c-C(N)N + CH_2CH$ | - 2 kJ/mol    |
|                     | $\rightarrow$ | $^3NCCN + CH_3$      | - 5 kJ/mol    |
|                     | $\rightarrow$ | $H_2CN + ^1CCNH$     | - 7 kJ/mol    |
|                     | $\rightarrow$ | $H_2CN + ^3CCNH$     | - 11 kJ/mol   |
|                     | $\rightarrow$ | $^3NCHCCNH + H$      | - 12 kJ/mol   |
|                     | $\rightarrow$ | $^3c-CH(NH)CH + CN$  | - 17 kJ/mol   |
|                     | $\rightarrow$ | $^1c-CH(N)CCHN + H$  | - 23 kJ/mol   |
|                     | $\rightarrow$ | $^1c-CH_2CC(N)N + H$ | - 30 kJ/mol   |
|                     | $\rightarrow$ | $^1c-CH_2NC(N)C + H$ | - 47 kJ/mol   |
|                     | $\rightarrow$ | $^1c-CH_2(NCN)C + H$ | - 48 kJ/mol   |
|                     | $\rightarrow$ | $HCNH + ^1HCCN$      | - 54 kJ/mol   |
|                     | $\rightarrow$ | $^1CHNCCNH + H$      | - 61 kJ/mol   |
|                     | $\rightarrow$ | $^1c-CH(N)CCNH + H$  | - 68 kJ/mol   |
|                     | $\rightarrow$ | $^1c-CH(NCN)CH + H$  | - 70 kJ/mol   |
|                     | $\rightarrow$ | $^3CH_2NCCN + H$     | - 70 kJ/mol   |
|                     | $\rightarrow$ | $^1CCNN + CH_3$      | - 72 kJ/mol   |
|                     | $\rightarrow$ | $^3CHNCHCN + H$      | - 87 kJ/mol   |
|                     | $\rightarrow$ | $^1NHCHCCN-i + H$    | - 90 kJ/mol   |
|                     | $\rightarrow$ | $^3CHNHCCN + H$      | - 91 kJ/mol   |
|                     | $\rightarrow$ | $c-CH(NH)C + ^1HNC$  | - 93 kJ/mol   |
|                     | $\rightarrow$ | $^1c-CH(NH)CCN + H$  | - 98 kJ/mol   |
|                     | $\rightarrow$ | $HCNH + ^3HCCN$      | - 104 kJ/mol  |
|                     | $\rightarrow$ | $^1CH_2CCNN + H$     | - 105 kJ/mol  |
|                     | $\rightarrow$ | $^1CH_2NH + C_2N$    | - 106 kJ/mol  |
|                     | $\rightarrow$ | $^1HCCN + H_2CN$     | - 108 kJ/mol  |
|                     | $\rightarrow$ | $^1c-C(NH)CHCN + H$  | - 116 kJ/mol  |

|       |                                                    |                  |
|-------|----------------------------------------------------|------------------|
| →     | $\text{H}_2\text{CN} + \text{CCNH}$                | - 119 kJ/mol     |
| →     | $c\text{-CH(NH)C} + {}^1\text{HCN}$                | - 150 kJ/mol     |
| <hr/> |                                                    |                  |
| →     | ${}^1c\text{-CH}_2(\text{N})\text{CH} + \text{CN}$ | - 153 kJ/mol     |
| →     | ${}^3\text{NCHCHCN} + \text{H}$                    | - 154 kJ/mol     |
| →     | ${}^3\text{HCCN} + \text{H}_2\text{CN}$            | - 157 kJ/mol     |
| →     | ${}^3\text{CHNCHCN} + \text{H}$                    | - 161 kJ/mol     |
| →     | ${}^1\text{CH}_2\text{NCCN} + \text{H}$            | - 194 kJ/mol     |
| →     | ${}^1\text{CHNCHCN} + \text{H}$                    | -200 kJ/mol      |
| →     | $c\text{-CH}_2(\text{N})\text{C} + {}^1\text{HNC}$ | - 210 kJ/mol     |
| →     | ${}^1\text{NHCCCNH} + \text{H}$                    | - 218 kJ/mol     |
| →     | ${}^1c\text{-CH}_2(\text{N})\text{CCN} + \text{H}$ | - 223 kJ/mol     |
| →     | ${}^1c\text{-CH(N)CHCN} + \text{H}$                | - 236 kJ/mol     |
| →     | $c\text{-CH}_2(\text{N})\text{C} + {}^1\text{HCN}$ | - 267 kJ/mol     |
| →     | ${}^1\text{NHCCHCN} + \text{H}$                    | - 318(.8) kJ/mol |
| →     | ${}^1\text{HNCCHCN} + \text{H}$                    | - 319(.2) kJ/mol |
| →     | $\text{CH}_3\text{CC} + \text{N}_2$                | - 344 kJ/mol     |
| →     | ${}^3\text{CNCHCN} + \text{H}_2$                   | - 365 kJ/mol     |
| →     | $\text{CH}_2\text{NC} + {}^1\text{HCN}$            | - 382 kJ/mol     |
| →     | ${}^1\text{NCCN} + \text{CH}_3$                    | - 420 kJ/mol     |
| →     | $\text{CH}_2\text{CCH} + \text{N}_2$               | - 516 kJ/mol     |
| <hr/> |                                                    |                  |

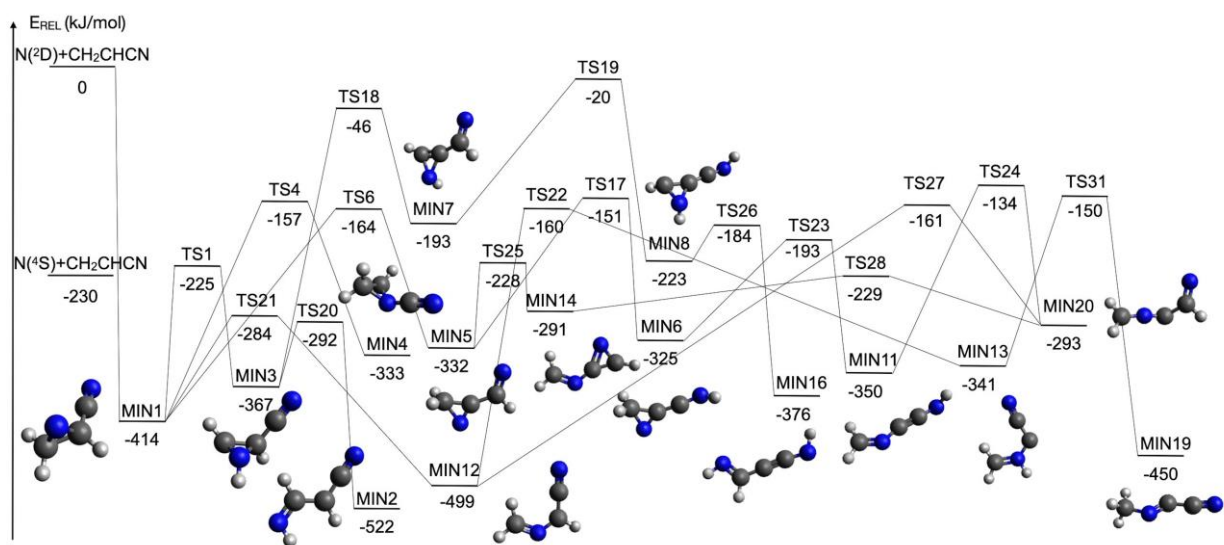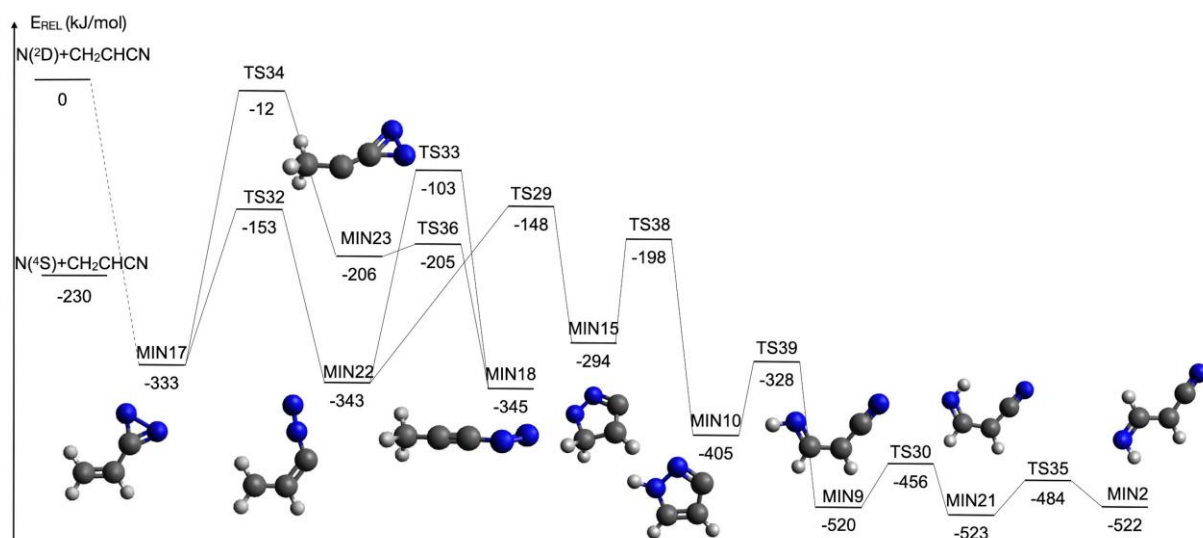

**Figure S1:** Schematic representation of the Potential Energy Surface including all possible isomerization processes for the  $N(^2D) + CH_2CHCN$  reaction identified at the CCSD(T)/aug-cc-pVTZ//B3LYP/aug-cc-pVTZ level of theory. (Top): considering only  $N(^2D)$  addition to the double bond. (Bottom): considering the attack of the  $N(^2D)$  atom to the triple bond of CN and to the lone pair of the nitrogen atom.

List of all possible products starting from the various minima identified in the Potential Energy Surface, with relative energies reported at the CCSD(T)/aug-cc-pVTZ//B3LYP/aug-cc-pVTZ level of theory.

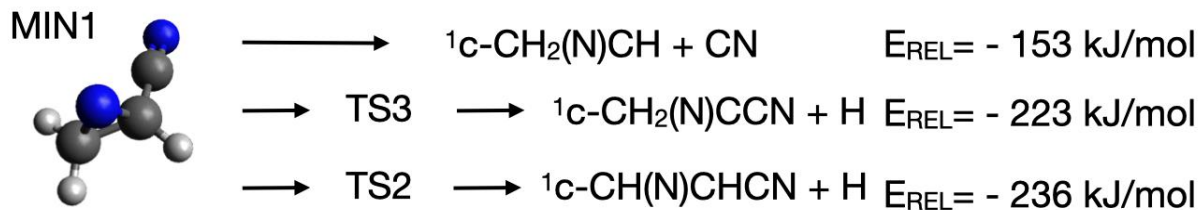

$E_{\text{REL}} = -414 \text{ kJ/mol}$

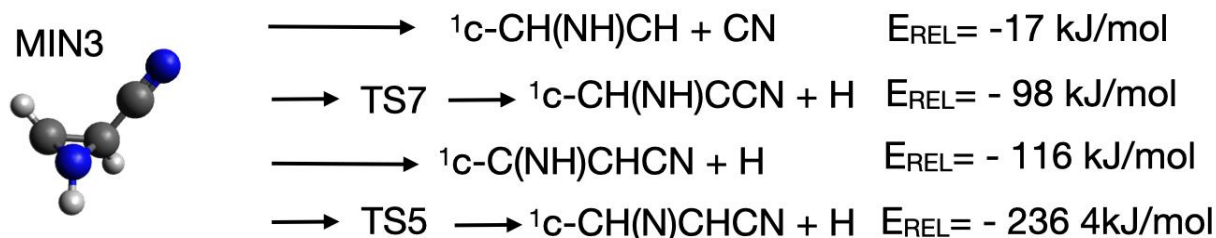

$E_{\text{REL}} = -367 \text{ kJ/mol}$

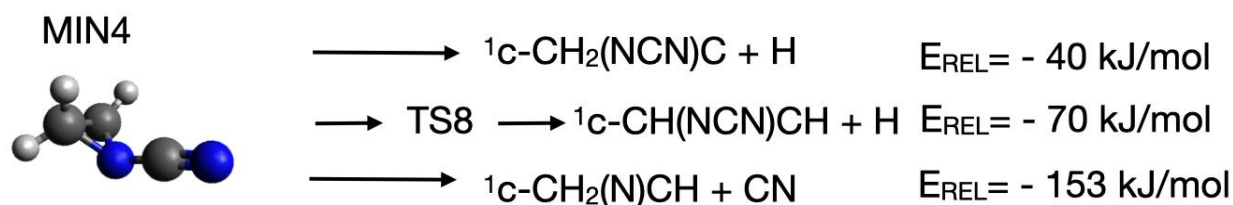

$E_{\text{REL}} = -333 \text{ kJ/mol}$

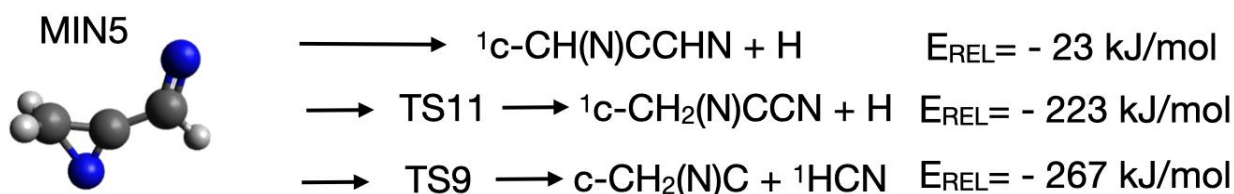

$E_{\text{REL}} = -333 \text{ kJ/mol}$

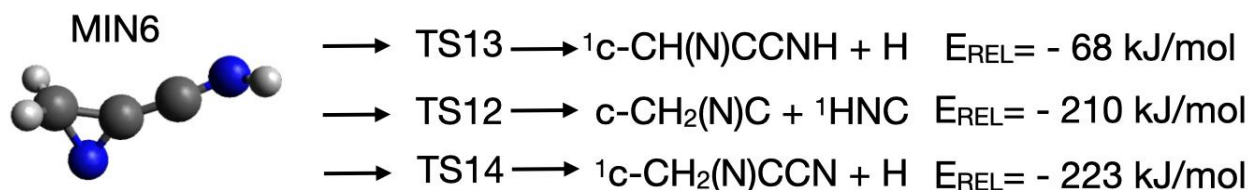

$E_{\text{REL}} = -325 \text{ kJ/mol}$

MIN7

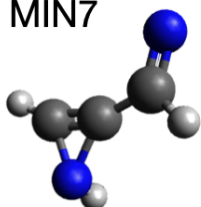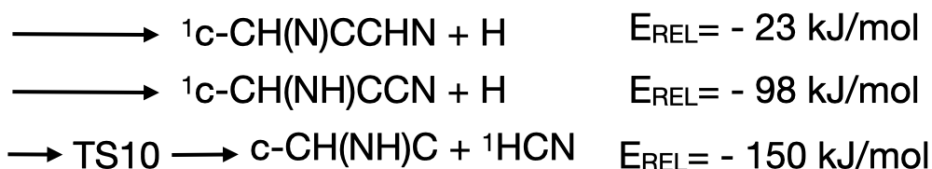

$E_{\text{REL}} = - 193 \text{ kJ/mol}$

MIN8

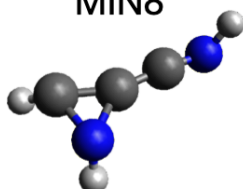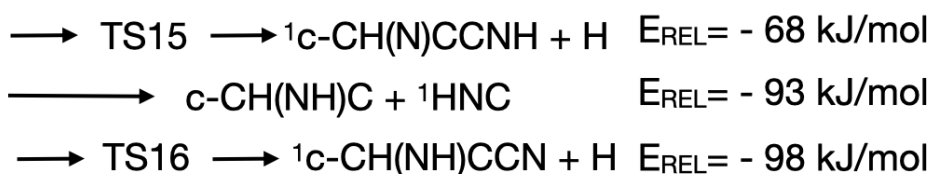

$E_{\text{REL}} = - 223 \text{ kJ/mol}$

MIN14

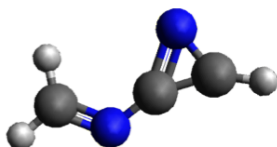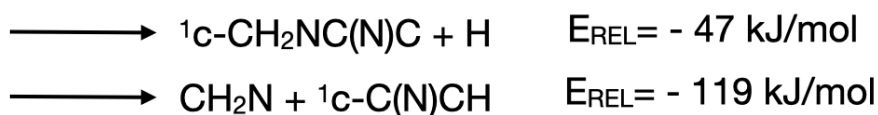

$E_{\text{REL}} = - 291 \text{ kJ/mol}$

MIN2

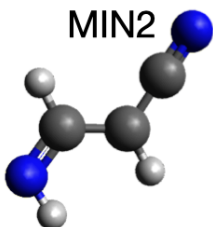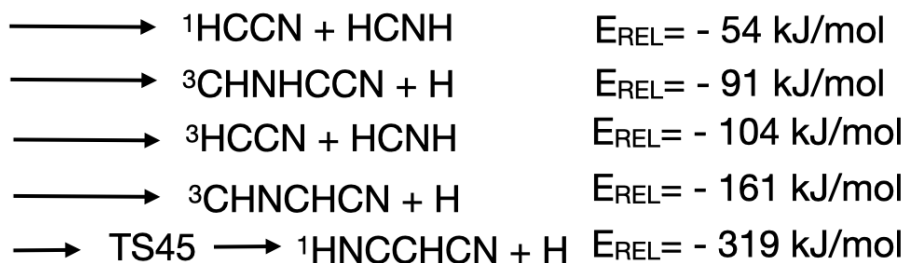

$E_{\text{REL}} = - 522 \text{ kJ/mol}$

MIN21

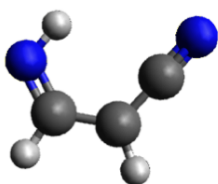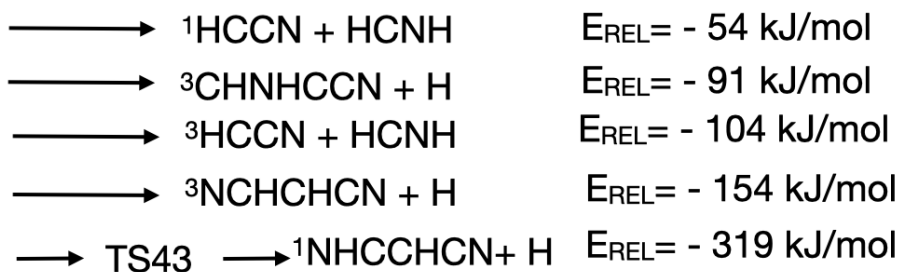

$E_{\text{REL}} = - 523 \text{ kJ/mol}$

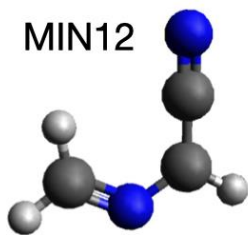

MIN12

$E_{REL} = -499$  kJ/mol

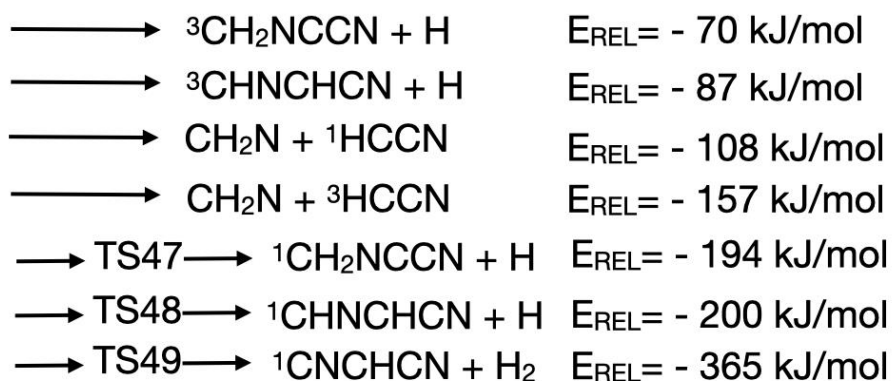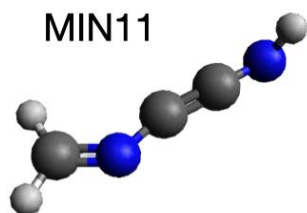

MIN11

$E_{REL} = -350$  kJ/mol

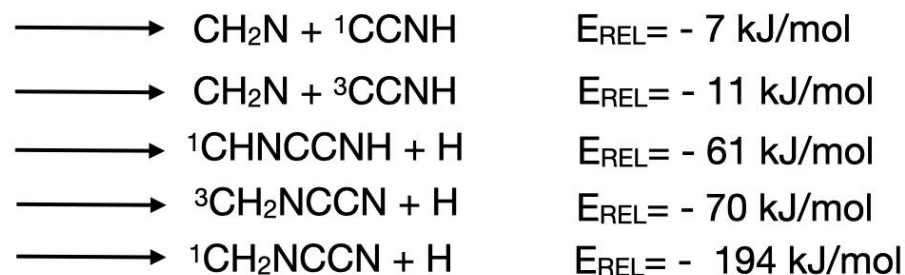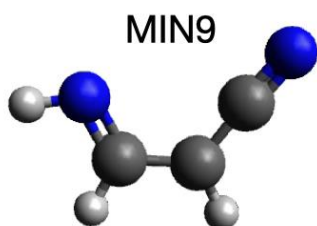

MIN9

$E_{REL} = -520$  kJ/mol

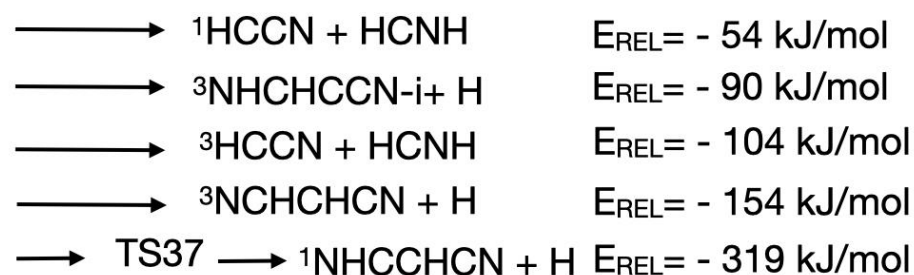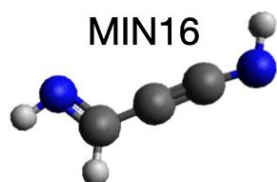

MIN16

$E_{REL} = -376$  kJ/mol

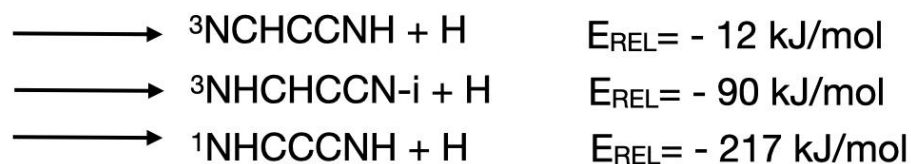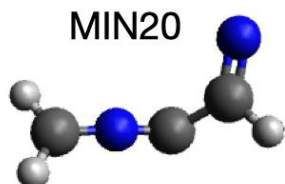

MIN20

$E_{REL} = -293$  kJ/mol

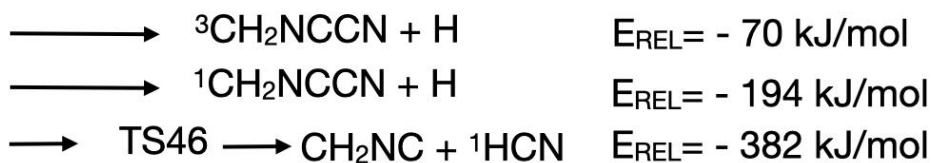

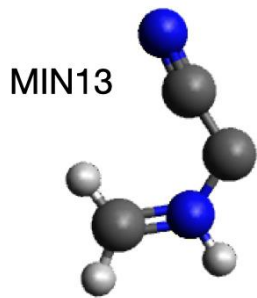

MIN13

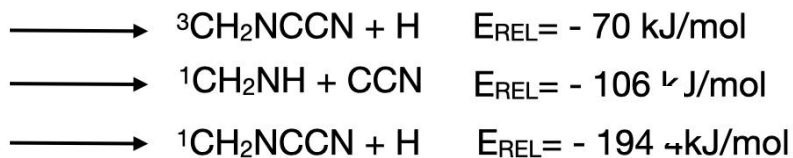

$E_{\text{REL}} = -341 \text{ kJ/mol}$

MIN19

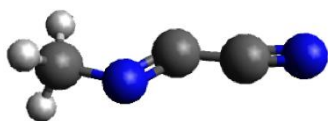

$E_{\text{REL}} = -450 \text{ kJ/mol}$

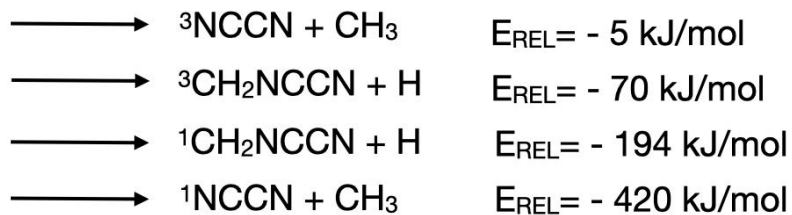

MIN18

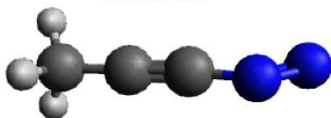

$E_{\text{REL}} = -354 \text{ kJ/mol}$

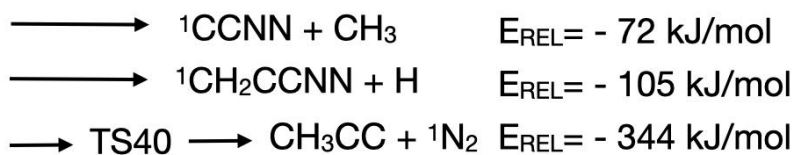

MIN10

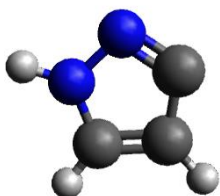

$E_{\text{REL}} = -405 \text{ kJ/mol}$

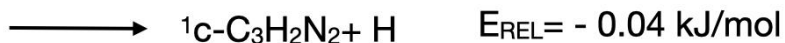

MIN15

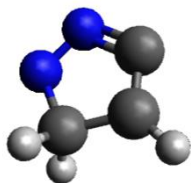

$E_{\text{REL}} = -294 \text{ kJ/mol}$

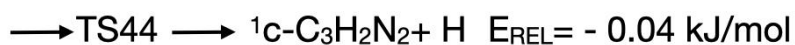



MIN23

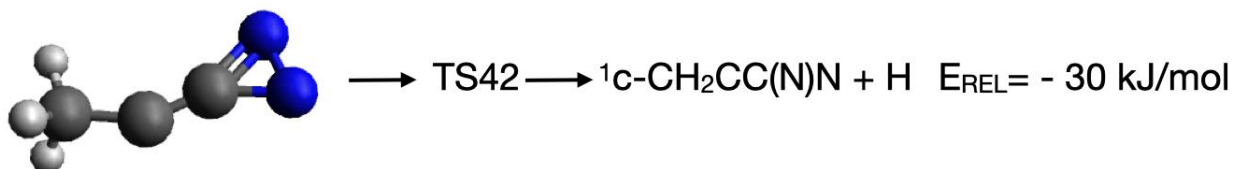

$E_{\text{REL}} = -206 \text{ kJ/mol}$

MIN17

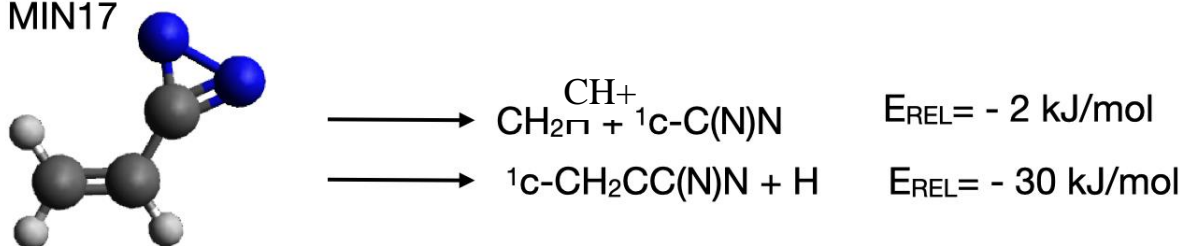

$E_{\text{REL}} = -335 \text{ kJ/mol}$

MIN22

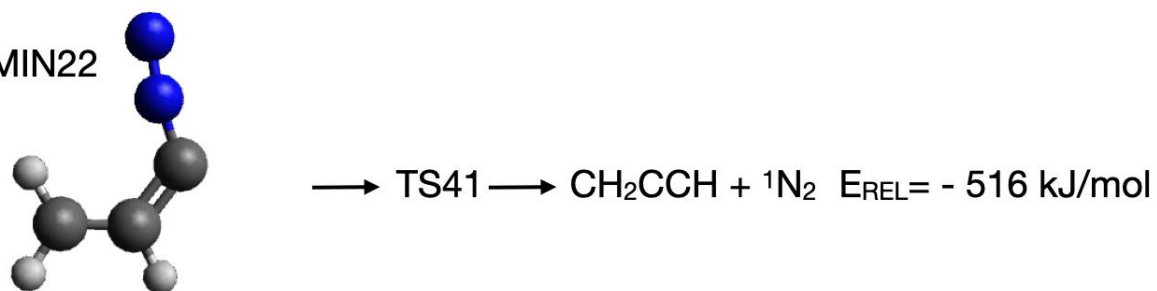

$E_{\text{REL}} = -343 \text{ kJ/mol}$

**Table S2:** Reaction Enthalpies and Barrier Heights, reported in kJ/mol, evaluated at the CCSD(T)/aug-cc-pVTZ//B3LYP/aug-cc-pVTZ level of theory for the reaction  $N(^2D) + CH_2CHCN$ .

| process                            | $\Delta H^0_0$ | Barrier height | process                               | $\Delta H^0_0$ | Barrier height |
|------------------------------------|----------------|----------------|---------------------------------------|----------------|----------------|
| $N(^2D)+CH_2CHCN \rightarrow MIN1$ | -414           |                | $MIN1 \rightarrow ^1c-CH_2(N)CCN+H$   | 191            | 215            |
| $MIN1 \rightarrow MIN3$            | 47             | 189            | $MIN1 \rightarrow ^1c-CH(N)CHCN+H$    | 178            | 193            |
| $MIN1 \rightarrow MIN4$            | 81             | 260            | $MIN3 \rightarrow ^1c-CH(NH)CH+CN$    | 350            |                |
| $MIN1 \rightarrow MIN12$           | -85            | 130            | $MIN3 \rightarrow ^1c-CH(NH)CCN+H$    | 269            | 275            |
| $MIN1 \rightarrow MIN5$            | 82             | 250            | $MIN3 \rightarrow ^1c-C(NH)CHCN+H$    | 251            |                |
| $MIN3 \rightarrow MIN2$            | -155           | 75             | $MIN3 \rightarrow ^1c-CH(N)CHCN+H$    | 131            | 148            |
| $MIN3 \rightarrow MIN7$            | 174            | 321            | $MIN4 \rightarrow ^1c-CH_2(NCN)C+H$   | 293            |                |
| $MIN7 \rightarrow MIN8$            | -30            | 173            | $MIN4 \rightarrow ^1c-CH(NCN)CH+H$    | 263            | 272            |
| $MIN5 \rightarrow MIN14$           | 41             | 104            | $MIN4 \rightarrow ^1c-CH_2(N)CH+CN$   | 180            |                |
| $MIN5 \rightarrow MIN6$            | 7              | 181            | $MIN5 \rightarrow ^1c-CH(N)CCHN+H$    | 309            |                |
| $MIN12 \rightarrow MIN13$          | 158            | 339            | $MIN5 \rightarrow ^1c-CH_2(N)CCN+H$   | 109            | 128            |
| $MIN12 \rightarrow MIN20$          | 206            | 338            | $MIN5 \rightarrow c-CH_2(N)C+^1HCN$   | 65             | 110            |
| $MIN14 \rightarrow MIN20$          | -2             | 62             | $MIN6 \rightarrow ^1c-CH(N)CCNH+H$    | 257            | 271            |
| $MIN8 \rightarrow MIN16$           | -153           | 39             | $MIN6 \rightarrow ^1c-CH_2(N)C+^1HNC$ | 115            | 147            |
| $MIN6 \rightarrow MIN11$           | -25            | 132            | $MIN6 \rightarrow ^1c-CH_2(N)CCN+H$   | 102            | 128            |
| $MIN11 \rightarrow MIN20$          | 57             | 216            | $MIN7 \rightarrow ^1c-CH(N)CCHN+H$    | 170            |                |
| $MIN13 \rightarrow MIN19$          | -109           | 191            | $MIN7 \rightarrow ^1c-CH(NH)CCN+H$    | 95             |                |
| $MIN2 \rightarrow MIN21$           | -1             | 38             | $MIN7 \rightarrow c-CH(NH)C+^1HCN$    | 43             | 131            |
| $MIN21 \rightarrow MIN9$           | 3              | 67             | $MIN8 \rightarrow ^1c-CH(N)CCNH+H$    | 135            | 167            |
| $MIN9 \rightarrow MIN10$           | 115            | 192            | $MIN8 \rightarrow c-CH(NH)C+^1HCN$    | 130            |                |
| $MIN10 \rightarrow MIN15$          | 111            | 207            | $MIN8 \rightarrow ^1c-CH(NH)CCN+H$    | 125            | 152            |
| $MIN15 \rightarrow MIN22$          | -49            | 146            | $MIN14 \rightarrow ^1c-CH_2NC(N)C+H$  | 244            |                |
| $MIN22 \rightarrow MIN17$          | 10             | 190            | $MIN14 \rightarrow H_2CN+^1c-C(N)CH$  | 172            |                |
| $MIN17 \rightarrow MIN23$          | 127            | 321            | $MIN2 \rightarrow HCNH+^1HCCN$        | 468            |                |
| $MIN23 \rightarrow MIN18$          | -139           | 1              | $MIN2 \rightarrow ^3CHNHCCN+H$        | 431            |                |
| $MIN22 \rightarrow MIN18$          | -2             | 240            | $MIN2 \rightarrow HCNH+^3HCCN$        | 418            |                |
| $MIN2 \rightarrow ^1HNCCHCN+H$     | 203            | 226            | $MIN2 \rightarrow ^3CHNCHCN+H$        | 361            |                |
| $MIN21 \rightarrow HCNH+^1HCCN$    | 469            |                |                                       |                |                |

| process                                               | $\Delta H^0_0$ | Barrier height | process                                                                    | $\Delta H^0_0$ | Barrier height |
|-------------------------------------------------------|----------------|----------------|----------------------------------------------------------------------------|----------------|----------------|
| MIN1 $\rightarrow$ $^1c$ -CH <sub>2</sub> (N)CH+CN    | 261            |                | MIN21 $\rightarrow$ $^3$ CHNHCCN+H                                         | 432            |                |
| MIN21 $\rightarrow$ HCNH+ $^3$ HCCN                   | 419            |                | MIN16 $\rightarrow$ $^3$ NCHCCNH+H                                         | 364            |                |
| MIN21 $\rightarrow$ $^3$ NCHCHCN+H                    | 369            |                | MIN16 $\rightarrow$ $^3$ NHCHCCN-i+H                                       | 286            |                |
| MIN21 $\rightarrow$ $^1$ NHCCHCN+H                    | 204            | 239            | MIN16 $\rightarrow$ $^1$ NHCCCNH+H                                         | 159            |                |
| MIN12 $\rightarrow$ $^3$ CH <sub>2</sub> NCCN+H       | 429            |                | MIN20 $\rightarrow$ $^3$ CH <sub>2</sub> NCCN+H                            | 223            |                |
| MIN12 $\rightarrow$ $^3$ CHNCHCN+H                    | 412            |                | MIN20 $\rightarrow$ $^1$ CH <sub>2</sub> NCCN+H                            | 99             |                |
| MIN12 $\rightarrow$ CH <sub>2</sub> N+ $^1$ HCCN      | 391            |                | MIN20 $\rightarrow$ CH <sub>2</sub> NC+ $^1$ HCN                           | -89            | 20             |
| MIN12 $\rightarrow$ CH <sub>2</sub> N+ $^3$ HCCN      | 342            |                | MIN13 $\rightarrow$ $^3$ CH <sub>2</sub> NCCN+H                            | 271            |                |
| MIN12 $\rightarrow$ $^1$ CH <sub>2</sub> NCCN+H       | 305            | 304            | MIN13 $\rightarrow$ $^1$ CH <sub>2</sub> NH+CCN                            | 235            |                |
| MIN12 $\rightarrow$ $^1$ CHNCHCN+H                    | 299            | 299            | MIN13 $\rightarrow$ $^1$ CH <sub>2</sub> NCCN+H                            | 147            |                |
| MIN12 $\rightarrow$ $^1$ CNCHCN+H <sub>2</sub>        | 134            | 349            | MIN19 $\rightarrow$ $^3$ NCCN+CH <sub>3</sub>                              | 445            |                |
| MIN11 $\rightarrow$ $^1$ CH <sub>2</sub> N+ $^1$ CCNH | 343            |                | MIN19 $\rightarrow$ $^3$ CH <sub>2</sub> NCCN+H                            | 380            |                |
| MIN11 $\rightarrow$ $^1$ CH <sub>2</sub> N+ $^3$ CCNH | 339            |                | MIN19 $\rightarrow$ $^1$ CH <sub>2</sub> NCCN+H                            | 256            |                |
| MIN11 $\rightarrow$ $^1$ CHNCCNH+H                    | 289            |                | MIN19 $\rightarrow$ $^1$ NCCN+CH <sub>3</sub>                              | 30             |                |
| MIN11 $\rightarrow$ $^3$ CH <sub>2</sub> NCCN+H       | 280            |                | MIN18 $\rightarrow$ $^1$ CCNN+CH <sub>3</sub>                              | 282            |                |
| MIN11 $\rightarrow$ $^1$ CH <sub>2</sub> NCCN+H       | 156            |                | MIN18 $\rightarrow$ $^1$ CH <sub>2</sub> CCNN+H                            | 249            |                |
| MIN9 $\rightarrow$ $^1$ HCCN+HCNH                     | 466            |                | MIN18 $\rightarrow$ CH <sub>3</sub> CC+N <sub>2</sub>                      | 10             | 53             |
| MIN9 $\rightarrow$ $^3$ NHCHCCN-i+H                   | 430            |                | MIN10 $\rightarrow$ $^1c$ -C <sub>3</sub> H <sub>2</sub> N <sub>2</sub> +H | 404            |                |
| MIN9 $\rightarrow$ $^3$ HCCN+HCNH                     | 416            |                | MIN15 $\rightarrow$ $^1c$ -C <sub>3</sub> H <sub>2</sub> N <sub>2</sub> +H | 293            | 312            |
| MIN9 $\rightarrow$ $^3$ NCHCHCN+H                     | 366            |                | MIN23 $\rightarrow$ $^1c$ -CH <sub>2</sub> CC(N)N+H                        | 176            | 183            |
| MIN9 $\rightarrow$ $^3$ NHCCHCN+H                     | 201            | 224            | MIN17 $\rightarrow$ CH <sub>2</sub> CH+ $^1c$ -C(N)N                       | 333            |                |
| MIN17 $\rightarrow$ $^1c$ -CH <sub>2</sub> CC(N)N+H   | 305            |                | MIN22 $\rightarrow$ CH <sub>2</sub> CCH+N <sub>2</sub>                     | -173           | 47             |

In the following pages are reported the structures of all the stationary points identified at the B3LYP/aug-cc-pVTZ level of theory for the N(<sup>2</sup>D) + CH<sub>2</sub>CHCN reaction. In details, the geometries are reported in the form of the z-matrix where the first column indicates the bond distances (in Å), the second column reports the bond angles and the third column reports the dihedral angles (both expressed in degrees °).

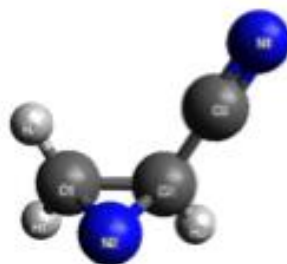

|   |   |         |   |           |   |           |
|---|---|---------|---|-----------|---|-----------|
| C |   |         |   |           |   |           |
| C | 1 | 1.48413 |   |           |   |           |
| C | 2 | 1.43796 | 1 | 121.51173 |   |           |
| N | 2 | 2.58852 | 1 | 121.46200 | 3 | 359.63806 |
| N | 1 | 1.44099 | 2 | 60.63778  | 3 | 255.31827 |
| H | 1 | 1.08512 | 2 | 118.39739 | 3 | 149.13959 |
| H | 1 | 1.08514 | 2 | 119.58098 | 3 | 359.80186 |
| H | 2 | 1.08454 | 1 | 118.56514 | 3 | 207.49882 |

MIN1

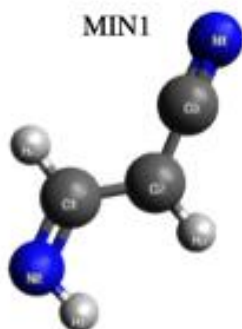

|   |   |         |   |           |   |           |
|---|---|---------|---|-----------|---|-----------|
| C |   |         |   |           |   |           |
| C | 1 | 1.42041 |   |           |   |           |
| C | 2 | 1.39590 | 1 | 122.60438 |   |           |
| N | 2 | 2.55624 | 1 | 122.66544 | 3 | 359.99851 |
| N | 1 | 1.29497 | 2 | 125.69643 | 3 | 179.97771 |
| H | 5 | 1.02254 | 1 | 111.14508 | 2 | 0.00888   |
| H | 1 | 1.08781 | 2 | 117.14578 | 3 | 359.97537 |
| H | 2 | 1.08330 | 1 | 119.84721 | 3 | 180.00045 |

MIN2

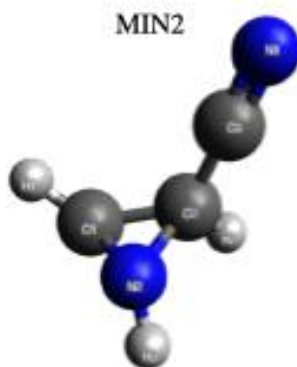

|   |   |         |   |           |   |           |
|---|---|---------|---|-----------|---|-----------|
| C |   |         |   |           |   |           |
| C | 1 | 1.47050 |   |           |   |           |
| C | 2 | 1.44290 | 1 | 123.08557 |   |           |
| N | 2 | 2.59317 | 1 | 123.14645 | 3 | 358.81764 |
| N | 1 | 1.38732 | 2 | 62.95597  | 3 | 259.30795 |
| H | 1 | 1.08061 | 2 | 133.23342 | 3 | 15.82347  |
| H | 2 | 1.08423 | 1 | 117.10265 | 3 | 208.37355 |
| H | 5 | 1.01588 | 1 | 118.01344 | 2 | 255.80009 |

MIN3

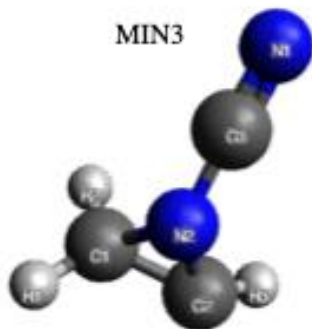

|   |   |         |   |           |   |           |
|---|---|---------|---|-----------|---|-----------|
| C |   |         |   |           |   |           |
| C | 1 | 1.46027 |   |           |   |           |
| C | 2 | 2.43280 | 1 | 75.64853  |   |           |
| N | 3 | 1.15590 | 2 | 154.55843 | 1 | 232.01177 |
| N | 3 | 1.33829 | 2 | 28.12325  | 1 | 58.07189  |
| H | 1 | 1.08143 | 2 | 120.62603 | 3 | 235.71972 |
| H | 1 | 1.08475 | 2 | 119.16431 | 3 | 79.20453  |
| H | 2 | 1.08048 | 1 | 130.93427 | 3 | 270.95231 |

MIN4

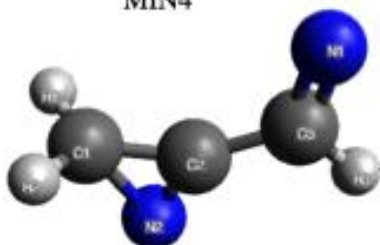

|   |   |         |   |           |   |           |
|---|---|---------|---|-----------|---|-----------|
| C |   |         |   |           |   |           |
| C | 1 | 1.44353 |   |           |   |           |
| C | 2 | 1.46116 | 1 | 152.60936 |   |           |
| N | 3 | 1.24853 | 2 | 123.58389 | 1 | 0.11612   |
| N | 2 | 1.25202 | 1 | 69.73476  | 3 | 180.18661 |
| H | 1 | 1.08268 | 2 | 120.42708 | 3 | 80.24268  |
| H | 1 | 1.08266 | 2 | 120.46259 | 3 | 279.43136 |
| H | 3 | 1.09744 | 2 | 116.00579 | 1 | 180.09011 |

MIN5

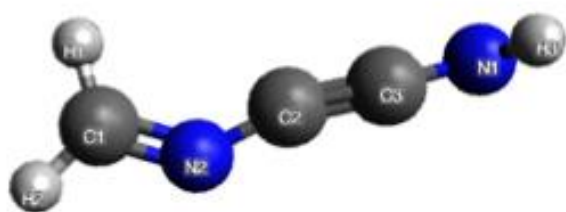

|   |   |         |   |           |   |
|---|---|---------|---|-----------|---|
| C |   |         |   |           |   |
| C | 1 | 2.36208 |   |           |   |
| C | 2 | 1.25507 | 1 | 173.30954 |   |
| N | 3 | 1.24944 | 2 | 171.70926 | 1 |
| N | 1 | 1.27356 | 2 | 22.77085  | 3 |
| H | 1 | 1.08842 | 2 | 99.60938  | 3 |
| H | 1 | 1.08233 | 2 | 141.33908 | 3 |
| H | 4 | 1.01528 | 3 | 117.58679 | 2 |

MIN11

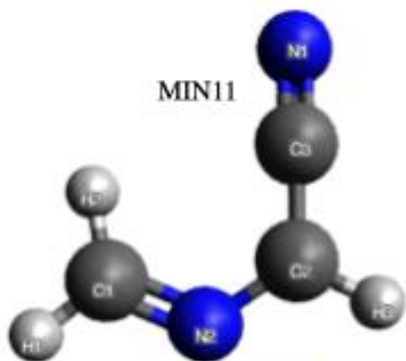

|   |   |         |   |           |   |
|---|---|---------|---|-----------|---|
| C |   |         |   |           |   |
| C | 1 | 2.30439 |   |           |   |
| C | 2 | 1.41411 | 1 | 95.80372  |   |
| N | 2 | 2.57182 | 1 | 95.37976  | 3 |
| N | 1 | 1.30006 | 2 | 29.86353  | 3 |
| H | 1 | 1.08253 | 2 | 147.92001 | 3 |
| H | 1 | 1.09094 | 2 | 93.59184  | 3 |
| H | 2 | 1.08104 | 1 | 146.58686 | 3 |

MIN12

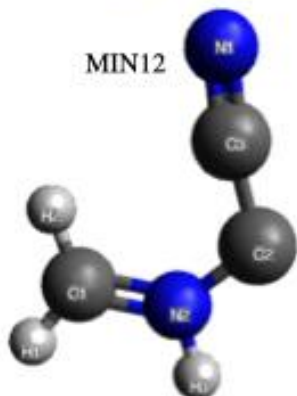

|   |   |         |   |           |   |
|---|---|---------|---|-----------|---|
| C |   |         |   |           |   |
| C | 1 | 2.45376 |   |           |   |
| C | 2 | 1.40554 | 1 | 89.93147  |   |
| N | 3 | 1.16284 | 2 | 172.21330 | 1 |
| N | 2 | 1.34553 | 1 | 24.56896  | 3 |
| H | 1 | 1.07759 | 2 | 143.11272 | 3 |
| H | 1 | 1.07765 | 2 | 94.19155  | 3 |
| H | 5 | 1.01346 | 2 | 113.99596 | 1 |

MIN13

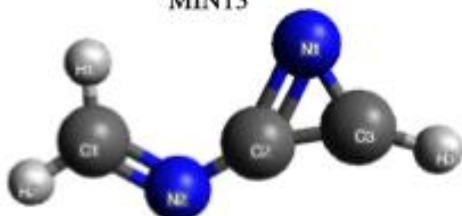

|   |   |         |   |           |   |
|---|---|---------|---|-----------|---|
| C |   |         |   |           |   |
| C | 1 | 2.27078 |   |           |   |
| C | 2 | 1.35188 | 1 | 170.47510 |   |
| N | 3 | 1.30452 | 2 | 67.72048  | 1 |
| N | 2 | 1.28411 | 1 | 30.43000  | 3 |
| H | 1 | 1.08621 | 2 | 93.20937  | 3 |
| H | 1 | 1.07967 | 2 | 147.02558 | 3 |
| H | 3 | 1.08312 | 2 | 155.27275 | 1 |

MIN14

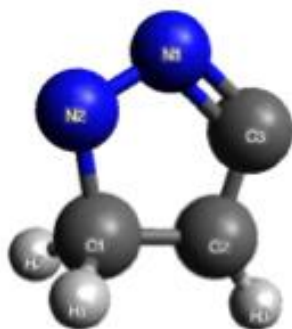

|   |   |         |   |           |   |
|---|---|---------|---|-----------|---|
| C |   |         |   |           |   |
| C | 1 | 1.48967 |   |           |   |
| H | 1 | 1.09391 | 2 | 114.39297 |   |
| H | 1 | 1.09388 | 2 | 114.30550 | 3 |
| C | 2 | 1.32990 | 1 | 102.67130 | 3 |
| H | 2 | 1.07530 | 1 | 127.55533 | 3 |
| N | 5 | 1.40607 | 2 | 114.43586 | 1 |
| N | 7 | 1.26059 | 5 | 108.43173 | 2 |

MIN15

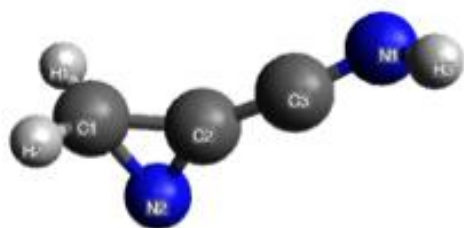

MIN6

|   |   |         |   |           |   |           |
|---|---|---------|---|-----------|---|-----------|
| C |   |         |   |           |   |           |
| C | 1 | 1.46101 |   |           |   |           |
| C | 2 | 1.32285 | 1 | 150.25975 |   |           |
| N | 3 | 1.21436 | 2 | 169.46774 | 1 | 275.34060 |
| N | 2 | 1.32157 | 1 | 64.56729  | 3 | 174.43277 |
| H | 1 | 1.08532 | 2 | 119.09587 | 3 | 81.85062  |
| H | 1 | 1.08537 | 2 | 119.61357 | 3 | 288.51215 |
| H | 4 | 1.01870 | 3 | 120.71285 | 2 | 170.28279 |

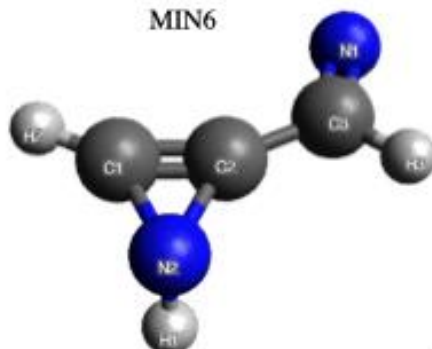

MIN7

|   |   |         |   |           |   |           |
|---|---|---------|---|-----------|---|-----------|
| C |   |         |   |           |   |           |
| C | 1 | 1.27712 |   |           |   |           |
| C | 2 | 1.43863 | 1 | 157.39000 |   |           |
| N | 3 | 1.25594 | 2 | 124.53457 | 1 | 343.43125 |
| N | 1 | 1.49596 | 2 | 66.10627  | 3 | 193.05591 |
| H | 5 | 1.02325 | 1 | 108.14793 | 2 | 260.98705 |
| H | 1 | 1.07247 | 2 | 155.42927 | 3 | 2.58430   |
| H | 3 | 1.09709 | 2 | 116.45091 | 1 | 163.66273 |

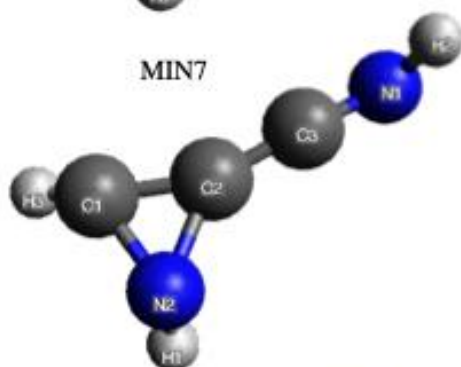

MIN8

|   |   |         |   |           |   |           |
|---|---|---------|---|-----------|---|-----------|
| C |   |         |   |           |   |           |
| C | 1 | 1.39163 |   |           |   |           |
| C | 2 | 1.29225 | 1 | 158.99765 |   |           |
| N | 3 | 1.22698 | 2 | 172.34883 | 1 | 269.36726 |
| N | 1 | 1.43095 | 2 | 63.35740  | 3 | 183.77630 |
| H | 5 | 1.02318 | 1 | 113.52443 | 2 | 257.86099 |
| H | 4 | 1.02031 | 3 | 116.11568 | 2 | 179.88952 |
| H | 1 | 1.08069 | 2 | 134.69101 | 3 | 63.31972  |

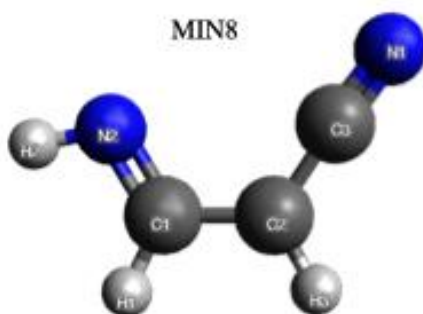

MIN9

|   |   |         |   |           |   |           |
|---|---|---------|---|-----------|---|-----------|
| C |   |         |   |           |   |           |
| C | 1 | 1.41955 |   |           |   |           |
| H | 1 | 1.09147 | 2 | 115.45191 |   |           |
| H | 1 | 1.91287 | 2 | 151.37042 | 3 | 179.98219 |
| C | 2 | 1.39875 | 1 | 123.59584 | 3 | 180.05733 |
| H | 2 | 1.08151 | 1 | 119.49415 | 3 | 0.06201   |
| N | 2 | 2.55664 | 1 | 124.85079 | 3 | 180.05924 |
| N | 4 | 1.01867 | 1 | 39.16777  | 2 | 0.01038   |

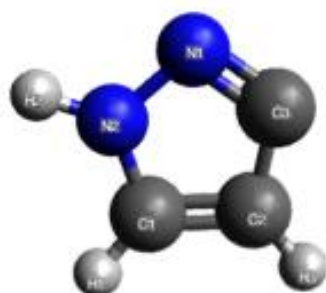

MIN10

|   |   |         |   |           |   |           |
|---|---|---------|---|-----------|---|-----------|
| C |   |         |   |           |   |           |
| C | 1 | 1.38148 |   |           |   |           |
| H | 1 | 1.07710 | 2 | 131.12999 |   |           |
| H | 1 | 2.12997 | 2 | 128.87948 | 3 | 179.85213 |
| C | 2 | 1.40673 | 1 | 102.34859 | 3 | 180.13433 |
| H | 2 | 1.07326 | 1 | 128.17504 | 3 | 359.98703 |
| N | 5 | 1.29232 | 2 | 114.92393 | 1 | 359.99341 |
| N | 4 | 1.00445 | 1 | 29.91918  | 2 | 0.05418   |

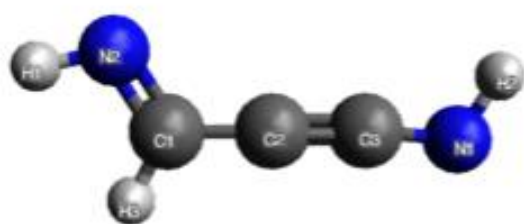

|   |   |         |   |           |   |           |
|---|---|---------|---|-----------|---|-----------|
| C |   |         |   |           |   |           |
| C | 1 | 1.39984 |   |           |   |           |
| C | 2 | 1.24724 | 1 | 179.97438 |   |           |
| N | 3 | 1.25427 | 2 | 174.08611 | 1 | 91.66048  |
| N | 1 | 1.29294 | 2 | 121.52440 | 3 | 88.34434  |
| H | 5 | 1.02075 | 1 | 109.98720 | 2 | 180.00454 |
| H | 4 | 1.01977 | 3 | 114.07047 | 2 | 179.88126 |
| H | 1 | 1.09314 | 2 | 116.40335 | 3 | 268.34743 |

MIN16

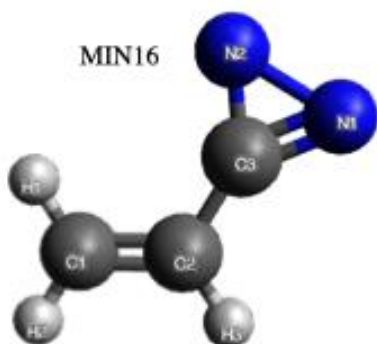

|   |   |         |   |           |   |           |
|---|---|---------|---|-----------|---|-----------|
| C |   |         |   |           |   |           |
| C | 1 | 1.33130 |   |           |   |           |
| H | 1 | 1.08194 | 2 | 121.11034 |   |           |
| H | 1 | 1.08079 | 2 | 121.37253 | 3 | 180.05970 |
| C | 2 | 1.44224 | 1 | 120.97488 | 3 | 0.18433   |
| H | 2 | 1.08201 | 1 | 122.33089 | 3 | 180.00492 |
| N | 5 | 1.29807 | 2 | 143.56535 | 1 | 179.49120 |
| N | 5 | 1.31521 | 2 | 143.65959 | 1 | 359.58295 |

MIN17

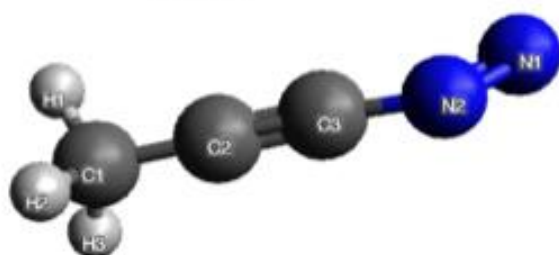

|   |   |         |   |           |   |           |
|---|---|---------|---|-----------|---|-----------|
| C |   |         |   |           |   |           |
| C | 1 | 1.45118 |   |           |   |           |
| H | 1 | 1.09110 | 2 | 110.87838 |   |           |
| H | 1 | 1.09092 | 2 | 111.38676 | 3 | 239.14591 |
| C | 3 | 3.19882 | 1 | 51.18506  | 2 | 0.96206   |
| H | 1 | 1.09156 | 2 | 110.24976 | 3 | 119.16370 |
| N | 5 | 2.31047 | 2 | 168.06293 | 1 | 3.77317   |
| N | 7 | 1.18148 | 5 | 26.07366  | 2 | 180.67675 |

MIN18

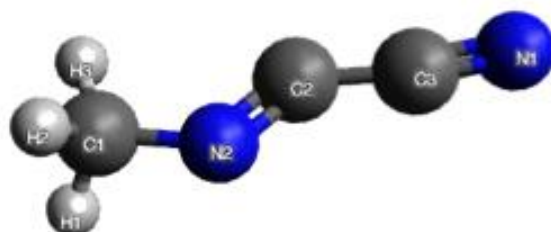

|   |   |         |   |           |   |           |
|---|---|---------|---|-----------|---|-----------|
| C |   |         |   |           |   |           |
| C | 1 | 2.40862 |   |           |   |           |
| H | 1 | 1.08944 | 2 | 119.12424 |   |           |
| H | 1 | 1.08945 | 2 | 119.20949 | 3 | 135.18202 |
| C | 2 | 1.38366 | 1 | 166.32438 | 3 | 292.53123 |
| H | 1 | 1.09028 | 2 | 88.85592  | 3 | 247.60004 |
| N | 5 | 1.16092 | 2 | 170.49350 | 1 | 179.82667 |
| N | 2 | 1.22236 | 1 | 28.14013  | 3 | 292.34580 |

MIN19

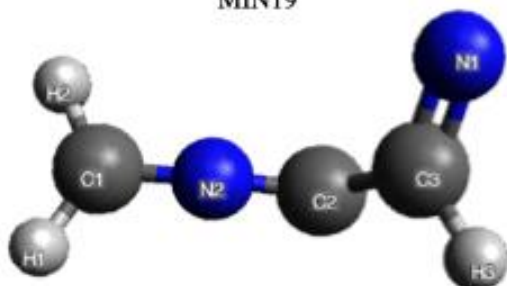

|   |   |         |   |           |   |           |
|---|---|---------|---|-----------|---|-----------|
| C |   |         |   |           |   |           |
| C | 1 | 2.48000 |   |           |   |           |
| C | 2 | 1.46976 | 1 | 130.41495 |   |           |
| N | 3 | 1.24905 | 2 | 124.38819 | 1 | 287.50481 |
| N | 3 | 2.40700 | 1 | 8.02101   | 2 | 359.03458 |
| H | 1 | 1.08051 | 2 | 119.71390 | 3 | 266.46191 |
| H | 1 | 1.08054 | 2 | 119.17330 | 3 | 89.75058  |
| H | 3 | 1.09732 | 2 | 114.79461 | 1 | 113.34406 |

MIN20

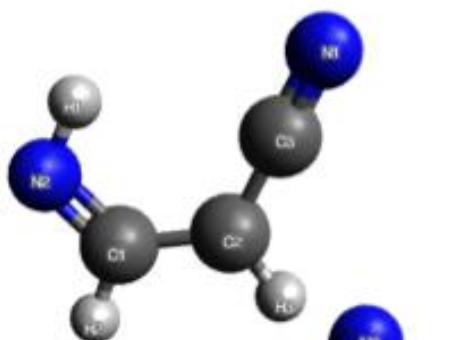

MIN21

|   |   |         |   |           |   |           |
|---|---|---------|---|-----------|---|-----------|
| C |   |         |   |           |   |           |
| C | 1 | 1.42257 |   |           |   |           |
| C | 2 | 1.39913 | 1 | 122.70734 |   |           |
| N | 2 | 2.55814 | 1 | 122.43735 | 3 | 359.99999 |
| N | 1 | 1.29476 | 2 | 127.46027 | 3 | 359.99982 |
| H | 5 | 1.02324 | 1 | 111.37344 | 2 | 0.00024   |
| H | 1 | 1.08775 | 2 | 115.63582 | 3 | 180.00095 |
| H | 2 | 1.08173 | 1 | 119.89615 | 3 | 179.99900 |

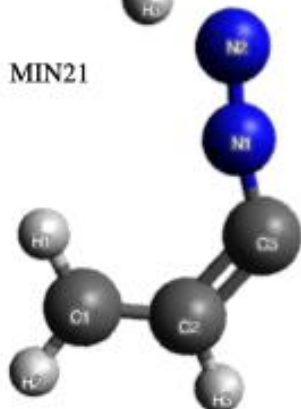

MIN22

|   |   |         |   |           |   |           |
|---|---|---------|---|-----------|---|-----------|
| C |   |         |   |           |   |           |
| C | 1 | 1.35702 |   |           |   |           |
| H | 1 | 1.08223 | 2 | 121.80386 |   |           |
| H | 1 | 1.08130 | 2 | 120.96847 | 3 | 180.03475 |
| C | 2 | 1.41697 | 1 | 126.02936 | 3 | 359.98788 |
| H | 2 | 1.08291 | 1 | 118.53757 | 3 | 179.99378 |
| N | 5 | 1.27769 | 2 | 123.78169 | 1 | 359.92965 |
| N | 7 | 1.14462 | 5 | 170.18439 | 2 | 180.56692 |

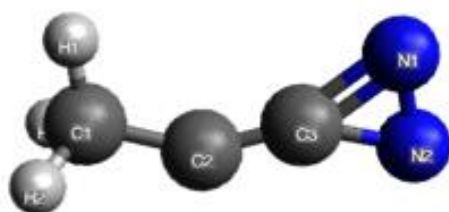

MIN23

|   |   |         |   |           |   |           |
|---|---|---------|---|-----------|---|-----------|
| C |   |         |   |           |   |           |
| C | 1 | 1.46096 |   |           |   |           |
| H | 1 | 1.09658 | 2 | 111.13729 |   |           |
| H | 1 | 1.09142 | 2 | 111.26348 | 3 | 240.01327 |
| C | 2 | 1.26262 | 1 | 150.45844 | 3 | 0.06913   |
| H | 1 | 1.09143 | 2 | 111.25629 | 3 | 119.97895 |
| N | 5 | 1.46942 | 2 | 156.24391 | 1 | 359.96484 |
| N | 7 | 1.23808 | 5 | 62.66843  | 2 | 180.02067 |

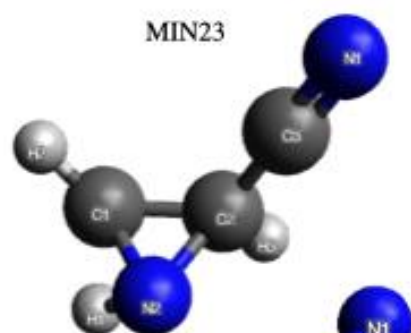

TS1

|   |   |         |   |           |   |           |
|---|---|---------|---|-----------|---|-----------|
| C |   |         |   |           |   |           |
| C | 1 | 1.46276 |   |           |   |           |
| C | 2 | 1.43954 | 1 | 118.68865 |   |           |
| N | 2 | 2.58968 | 1 | 119.15000 | 3 | 358.98415 |
| N | 1 | 1.45268 | 2 | 62.17248  | 3 | 259.63693 |
| H | 5 | 1.23186 | 1 | 56.60096  | 2 | 242.85982 |
| H | 1 | 1.08170 | 2 | 135.04126 | 3 | 16.15986  |
| H | 2 | 1.08283 | 1 | 121.07643 | 3 | 208.60482 |

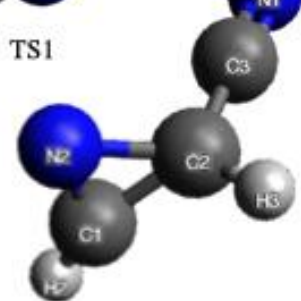

TS2

|   |   |         |   |           |   |           |
|---|---|---------|---|-----------|---|-----------|
| C |   |         |   |           |   |           |
| C | 1 | 1.46022 |   |           |   |           |
| C | 2 | 1.43765 | 1 | 121.53232 |   |           |
| N | 2 | 2.58880 | 1 | 121.73489 | 3 | 359.46185 |
| N | 1 | 1.25345 | 2 | 68.88325  | 3 | 259.50736 |
| H | 1 | 2.04931 | 2 | 99.55583  | 3 | 153.05607 |
| H | 1 | 1.07926 | 2 | 149.03658 | 3 | 60.99933  |
| H | 2 | 1.08162 | 1 | 120.02737 | 3 | 201.02992 |

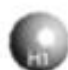



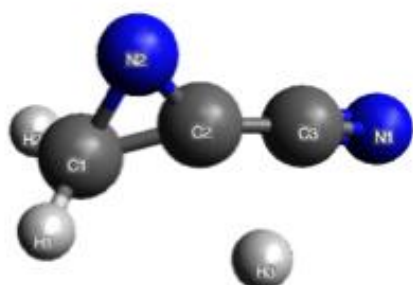

|   |   |         |   |           |   |           |
|---|---|---------|---|-----------|---|-----------|
| C |   |         |   |           |   |           |
| C | 1 | 1.45752 |   |           |   |           |
| C | 2 | 1.41012 | 1 | 149.72448 |   |           |
| N | 2 | 2.56159 | 1 | 148.41478 | 3 | 0.39612   |
| N | 2 | 1.26824 | 1 | 67.52599  | 3 | 155.53253 |
| H | 1 | 1.08194 | 2 | 119.22810 | 3 | 102.06481 |
| H | 1 | 1.08285 | 2 | 120.44464 | 3 | 303.74511 |
| H | 2 | 1.99977 | 1 | 97.71502  | 3 | 260.01139 |

TS3

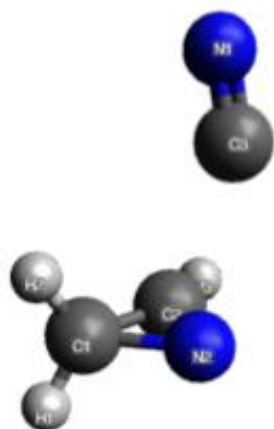

|   |   |         |   |           |   |           |
|---|---|---------|---|-----------|---|-----------|
| C |   |         |   |           |   |           |
| C | 1 | 1.44385 |   |           |   |           |
| C | 2 | 2.54805 | 1 | 101.04628 |   |           |
| N | 3 | 1.16121 | 2 | 146.99599 | 1 | 287.00614 |
| N | 2 | 1.26407 | 1 | 68.78264  | 3 | 74.11216  |
| H | 1 | 1.08370 | 2 | 120.52447 | 3 | 188.07353 |
| H | 1 | 1.08238 | 2 | 120.21575 | 3 | 27.85906  |
| H | 2 | 1.07941 | 1 | 152.19705 | 3 | 248.97503 |

TS4

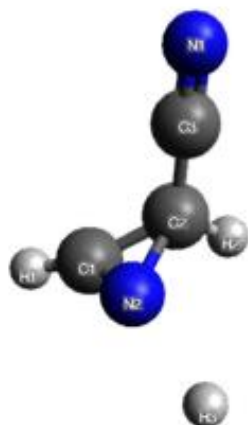

|   |   |         |   |           |   |           |
|---|---|---------|---|-----------|---|-----------|
| C |   |         |   |           |   |           |
| C | 1 | 1.45381 |   |           |   |           |
| C | 2 | 1.43836 | 1 | 121.63602 |   |           |
| N | 2 | 2.58924 | 1 | 121.89536 | 3 | 359.45388 |
| N | 1 | 1.25146 | 2 | 69.37188  | 3 | 258.84856 |
| H | 1 | 1.07885 | 2 | 149.52670 | 3 | 80.90902  |
| H | 2 | 1.08330 | 1 | 120.26102 | 3 | 200.16799 |
| H | 5 | 1.89639 | 1 | 121.56928 | 2 | 263.67664 |

TS5

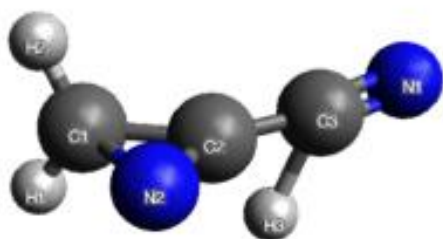

|   |   |         |   |           |   |           |
|---|---|---------|---|-----------|---|-----------|
| C |   |         |   |           |   |           |
| C | 1 | 1.45264 |   |           |   |           |
| C | 2 | 1.40279 | 1 | 149.98658 |   |           |
| N | 3 | 1.18206 | 2 | 172.37115 | 1 | 68.84424  |
| N | 2 | 1.29753 | 1 | 66.49941  | 3 | 173.16826 |
| H | 1 | 1.08410 | 2 | 119.99255 | 3 | 85.06949  |
| H | 1 | 1.08436 | 2 | 119.35918 | 3 | 289.42649 |
| H | 3 | 1.38151 | 2 | 64.85830  | 1 | 265.96302 |

TS6

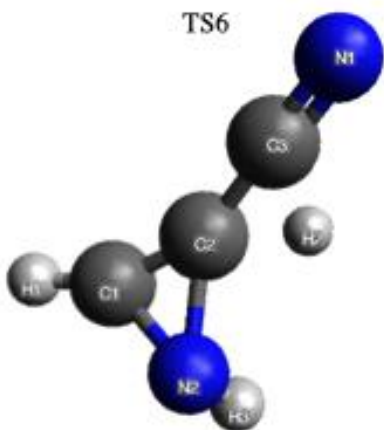

|   |   |         |   |           |   |           |
|---|---|---------|---|-----------|---|-----------|
| C |   |         |   |           |   |           |
| C | 1 | 1.28536 |   |           |   |           |
| C | 2 | 1.38317 | 1 | 155.85949 |   |           |
| N | 2 | 2.53846 | 1 | 156.38711 | 3 | 359.97513 |
| N | 1 | 1.45576 | 2 | 68.54067  | 3 | 212.74490 |
| H | 1 | 1.07442 | 2 | 152.66578 | 3 | 25.56146  |
| H | 2 | 2.32202 | 1 | 101.20654 | 3 | 242.10598 |
| H | 5 | 1.02314 | 1 | 109.56105 | 2 | 262.46439 |

TS7

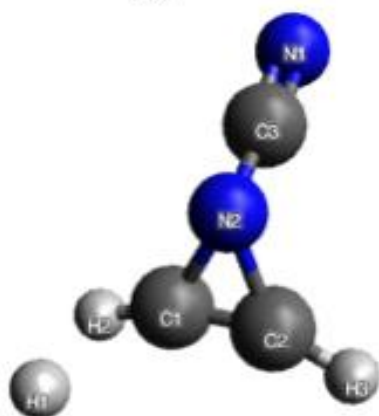

|   |   |         |   |           |   |           |
|---|---|---------|---|-----------|---|-----------|
| C |   |         |   |           |   |           |
| C | 1 | 1.27315 |   |           |   |           |
| C | 2 | 2.41900 | 1 | 75.58593  |   |           |
| N | 3 | 1.15530 | 2 | 150.20026 | 1 | 241.68894 |
| N | 3 | 1.36000 | 2 | 34.73613  | 1 | 66.72238  |
| H | 1 | 2.25479 | 2 | 107.93891 | 3 | 237.63250 |
| H | 1 | 1.07051 | 2 | 157.89697 | 3 | 132.54889 |
| H | 2 | 1.07138 | 1 | 158.35075 | 3 | 206.63855 |

TS8

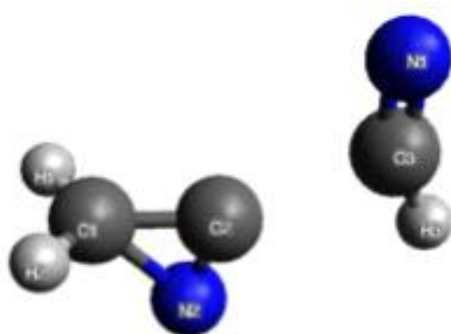

|   |   |         |   |           |   |           |
|---|---|---------|---|-----------|---|-----------|
| C |   |         |   |           |   |           |
| C | 1 | 1.46125 |   |           |   |           |
| C | 2 | 2.14731 | 1 | 155.54178 |   |           |
| N | 3 | 1.16659 | 2 | 114.68134 | 1 | 359.99929 |
| N | 2 | 1.22158 | 1 | 74.17787  | 3 | 179.98862 |
| H | 1 | 1.08031 | 2 | 120.32575 | 3 | 83.31084  |
| H | 1 | 1.08031 | 2 | 120.32580 | 3 | 276.71198 |
| H | 3 | 1.07204 | 2 | 91.05857  | 1 | 179.99860 |

TS9

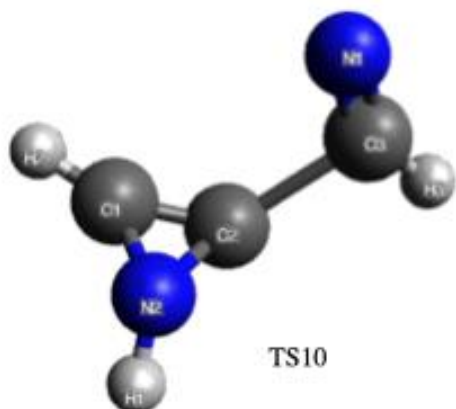

TS10

|   |   |         |   |           |   |           |
|---|---|---------|---|-----------|---|-----------|
| C |   |         |   |           |   |           |
| C | 1 | 1.34081 |   |           |   |           |
| C | 2 | 1.94771 | 1 | 129.85062 |   |           |
| N | 3 | 1.17623 | 2 | 107.31773 | 1 | 12.74259  |
| N | 1 | 1.37792 | 2 | 66.71955  | 3 | 252.34082 |
| H | 5 | 1.01872 | 1 | 124.76136 | 2 | 256.38308 |
| H | 1 | 1.07411 | 2 | 154.57844 | 3 | 61.71001  |
| H | 3 | 1.07261 | 2 | 104.29773 | 1 | 192.02353 |

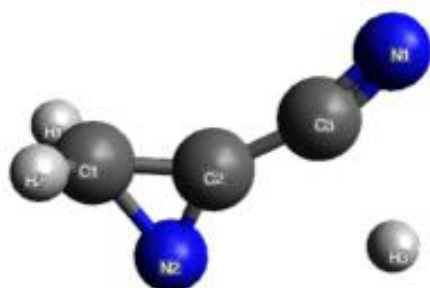

TS11

|   |   |         |   |           |   |           |
|---|---|---------|---|-----------|---|-----------|
| C |   |         |   |           |   |           |
| C | 1 | 1.44979 |   |           |   |           |
| C | 2 | 1.41576 | 1 | 149.64418 |   |           |
| N | 3 | 1.16247 | 2 | 161.98045 | 1 | 0.00000   |
| N | 2 | 1.25127 | 1 | 69.10094  | 3 | 180.00000 |
| H | 1 | 1.08242 | 2 | 120.01512 | 3 | 79.81988  |
| H | 1 | 1.08242 | 2 | 120.01509 | 3 | 280.18011 |
| H | 3 | 1.93581 | 2 | 93.84601  | 1 | 179.99997 |

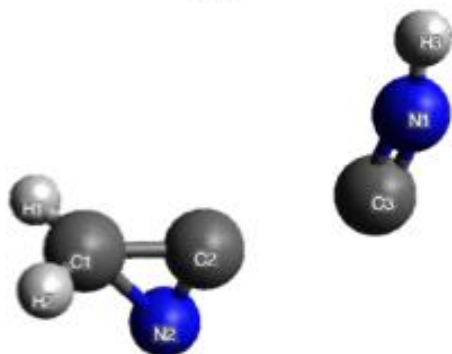

TS12

|   |   |         |   |           |   |           |
|---|---|---------|---|-----------|---|-----------|
| C |   |         |   |           |   |           |
| C | 1 | 1.48573 |   |           |   |           |
| C | 2 | 2.21634 | 1 | 159.13062 |   |           |
| N | 3 | 1.17133 | 2 | 121.85600 | 1 | 359.86579 |
| N | 2 | 1.22132 | 1 | 71.41010  | 3 | 179.95141 |
| H | 1 | 1.08103 | 2 | 120.26250 | 3 | 82.05618  |
| H | 1 | 1.08103 | 2 | 120.26349 | 3 | 278.03659 |
| H | 4 | 0.99790 | 3 | 165.04315 | 2 | 359.99535 |

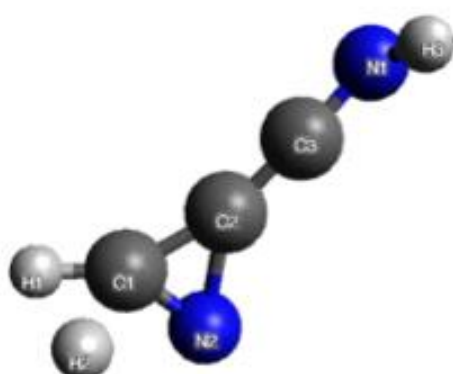

TS13

|   |   |         |   |           |   |           |
|---|---|---------|---|-----------|---|-----------|
| C |   |         |   |           |   |           |
| C | 1 | 1.40276 |   |           |   |           |
| C | 2 | 1.28113 | 1 | 163.18373 |   |           |
| N | 3 | 1.23334 | 2 | 171.24238 | 1 | 257.22697 |
| N | 1 | 1.26955 | 2 | 68.46899  | 3 | 193.61019 |
| H | 1 | 1.07948 | 2 | 150.32853 | 3 | 29.42746  |
| H | 1 | 2.17130 | 2 | 108.69187 | 3 | 290.61866 |
| H | 4 | 1.02076 | 3 | 114.74527 | 2 | 178.90679 |

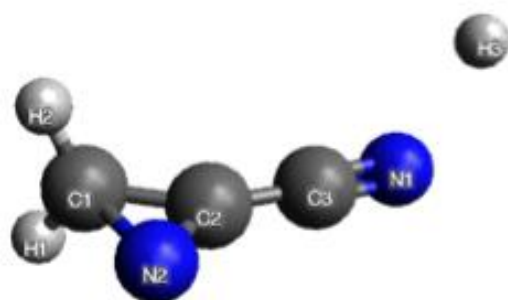

TS14

|   |   |         |   |           |   |           |
|---|---|---------|---|-----------|---|-----------|
| C |   |         |   |           |   |           |
| C | 1 | 1.45073 |   |           |   |           |
| C | 2 | 1.39786 | 1 | 150.34979 |   |           |
| N | 2 | 2.55545 | 1 | 149.05574 | 3 | 0.82544   |
| N | 2 | 1.25818 | 1 | 68.51310  | 3 | 180.89182 |
| H | 1 | 1.08261 | 2 | 119.91891 | 3 | 78.62016  |
| H | 1 | 1.08259 | 2 | 119.86236 | 3 | 279.75427 |
| H | 4 | 1.88315 | 3 | 118.73902 | 2 | 72.44304  |

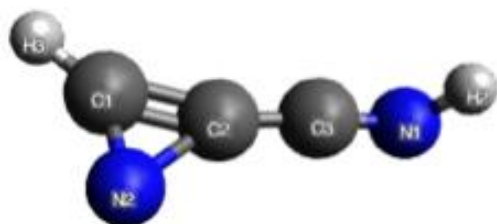

TS15

|   |   |         |   |           |   |           |
|---|---|---------|---|-----------|---|-----------|
| C |   |         |   |           |   |           |
| C | 1 | 1.39090 |   |           |   |           |
| C | 2 | 1.28095 | 1 | 164.47150 |   |           |
| N | 3 | 1.23275 | 2 | 171.62251 | 1 | 259.92390 |
| N | 1 | 1.26633 | 2 | 70.43894  | 3 | 191.35383 |
| H | 5 | 2.05016 | 1 | 117.83646 | 2 | 254.12354 |
| H | 4 | 1.02058 | 3 | 114.97487 | 2 | 179.37175 |
| H | 1 | 1.08083 | 2 | 149.87003 | 3 | 13.70150  |

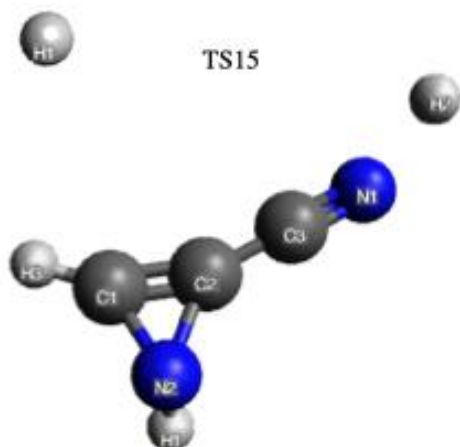

TS16

|   |   |         |   |           |   |           |
|---|---|---------|---|-----------|---|-----------|
| C |   |         |   |           |   |           |
| C | 1 | 1.28199 |   |           |   |           |
| C | 2 | 1.37209 | 1 | 158.48733 |   |           |
| N | 2 | 2.53442 | 1 | 159.01291 | 3 | 359.73893 |
| N | 1 | 1.47123 | 2 | 67.90895  | 3 | 186.81920 |
| H | 5 | 1.02424 | 1 | 108.65195 | 2 | 261.54389 |
| H | 4 | 1.88837 | 3 | 117.17319 | 2 | 255.61987 |
| H | 1 | 1.07361 | 2 | 153.32515 | 3 | 0.97955   |

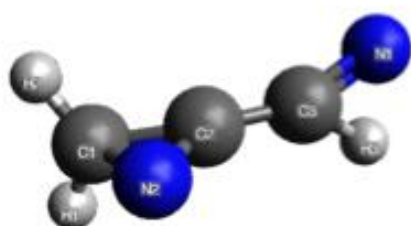

TS17

|   |   |         |   |           |   |           |
|---|---|---------|---|-----------|---|-----------|
| C |   |         |   |           |   |           |
| C | 1 | 1.45658 |   |           |   |           |
| C | 2 | 1.39776 | 1 | 148.25793 |   |           |
| N | 3 | 1.24406 | 2 | 154.42513 | 1 | 104.07383 |
| N | 2 | 1.27528 | 1 | 67.12012  | 3 | 198.45855 |
| H | 1 | 1.08412 | 2 | 120.47607 | 3 | 61.33968  |
| H | 1 | 1.08372 | 2 | 119.08077 | 3 | 264.63823 |
| H | 3 | 1.22233 | 2 | 142.02245 | 1 | 291.24233 |

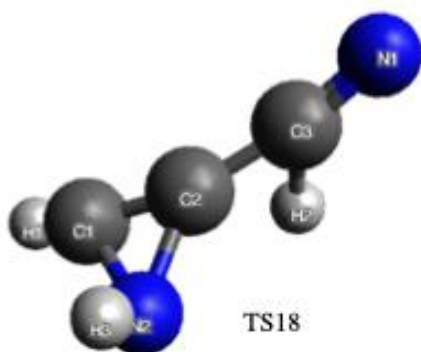

TS18

|   |   |         |   |           |   |           |
|---|---|---------|---|-----------|---|-----------|
| C |   |         |   |           |   |           |
| C | 1 | 1.32676 |   |           |   |           |
| C | 2 | 1.39661 | 1 | 158.68614 |   |           |
| N | 3 | 1.18827 | 2 | 167.47670 | 1 | 93.82943  |
| N | 1 | 1.46939 | 2 | 64.12674  | 3 | 167.63602 |
| H | 1 | 1.07285 | 2 | 149.73092 | 3 | 29.60414  |
| H | 3 | 1.30933 | 2 | 68.51834  | 1 | 274.07496 |
| H | 5 | 1.02243 | 1 | 111.00492 | 2 | 99.35570  |

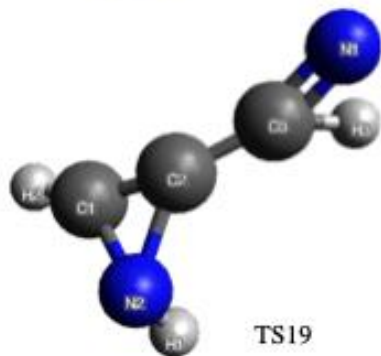

TS19

|   |   |         |   |           |   |           |
|---|---|---------|---|-----------|---|-----------|
| C |   |         |   |           |   |           |
| C | 1 | 1.30300 |   |           |   |           |
| C | 2 | 1.37667 | 1 | 154.70432 |   |           |
| N | 3 | 1.24947 | 2 | 154.67105 | 1 | 108.09371 |
| N | 1 | 1.46070 | 2 | 67.88197  | 3 | 139.37126 |
| H | 5 | 1.02865 | 1 | 108.70467 | 2 | 259.31164 |
| H | 1 | 1.07294 | 2 | 151.91087 | 3 | 336.11630 |
| H | 3 | 1.22070 | 2 | 141.13333 | 1 | 294.31889 |

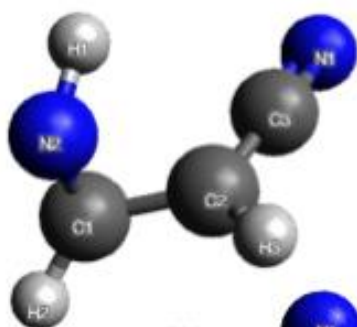

TS20

|   |   |         |   |           |   |           |
|---|---|---------|---|-----------|---|-----------|
| C |   |         |   |           |   |           |
| C | 1 | 1.45547 |   |           |   |           |
| C | 2 | 1.40968 | 1 | 121.99748 |   |           |
| N | 2 | 2.56606 | 1 | 121.74988 | 3 | 0.55518   |
| N | 1 | 1.33505 | 2 | 86.12000  | 3 | 260.36917 |
| H | 5 | 1.01928 | 1 | 115.34924 | 2 | 66.36000  |
| H | 1 | 1.08084 | 2 | 130.53889 | 3 | 126.77270 |
| H | 2 | 1.08038 | 1 | 120.05297 | 3 | 177.20408 |

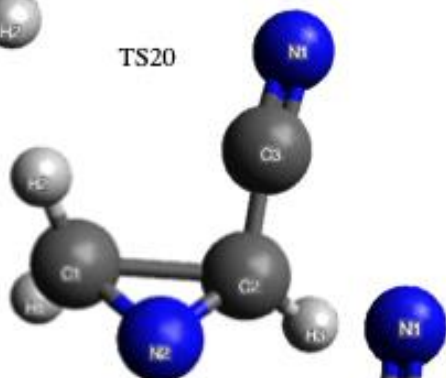

TS21

|   |   |         |   |           |   |           |
|---|---|---------|---|-----------|---|-----------|
| C |   |         |   |           |   |           |
| C | 1 | 1.90526 |   |           |   |           |
| C | 2 | 1.43727 | 1 | 95.71208  |   |           |
| N | 3 | 1.15533 | 2 | 174.50178 | 1 | 170.60227 |
| N | 2 | 1.34918 | 1 | 46.61021  | 3 | 138.83072 |
| H | 1 | 1.08300 | 2 | 114.64181 | 3 | 115.76314 |
| H | 1 | 1.08767 | 2 | 112.78191 | 3 | 335.36618 |
| H | 2 | 1.09095 | 1 | 140.62180 | 3 | 221.42865 |

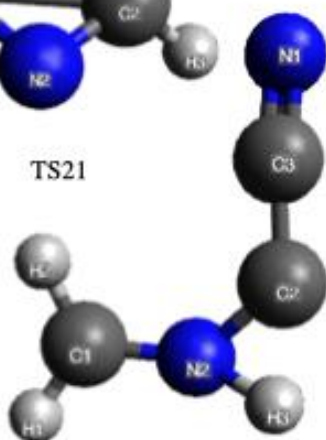

TS22

|   |   |         |   |           |   |           |
|---|---|---------|---|-----------|---|-----------|
| C |   |         |   |           |   |           |
| C | 1 | 2.43963 |   |           |   |           |
| C | 2 | 1.39473 | 1 | 104.85923 |   |           |
| N | 3 | 1.16281 | 2 | 174.10044 | 1 | 181.32540 |
| N | 1 | 1.31021 | 2 | 24.82317  | 3 | 158.10323 |
| H | 1 | 1.07904 | 2 | 143.10147 | 3 | 170.83803 |
| H | 1 | 1.08522 | 2 | 95.70608  | 3 | 344.07512 |
| H | 5 | 1.20645 | 1 | 143.91192 | 2 | 101.38188 |

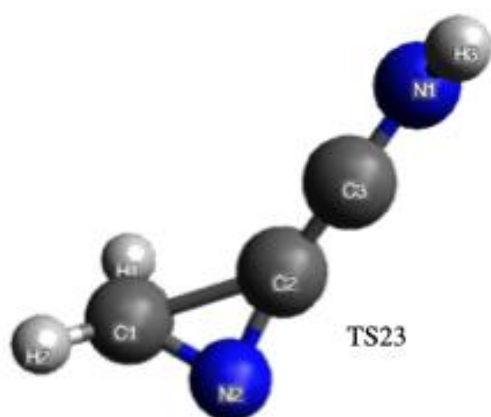

|   |   |         |   |           |   |
|---|---|---------|---|-----------|---|
| C |   |         |   |           |   |
| C | 1 | 1.84895 |   |           |   |
| C | 2 | 1.27267 | 1 | 144.69776 |   |
| N | 3 | 1.24142 | 2 | 167.06794 | 1 |
| N | 2 | 1.32754 | 1 | 47.14302  | 3 |
| H | 1 | 1.08480 | 2 | 93.11190  | 3 |
| H | 1 | 1.08996 | 2 | 137.58665 | 3 |
| H | 4 | 1.01470 | 3 | 119.11289 | 2 |

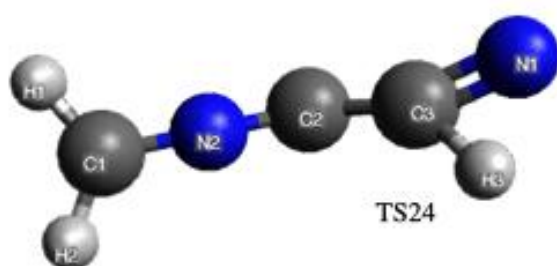

|   |   |         |   |           |   |
|---|---|---------|---|-----------|---|
| C |   |         |   |           |   |
| C | 1 | 2.48833 |   |           |   |
| C | 2 | 1.35842 | 1 | 142.07863 |   |
| N | 3 | 1.25799 | 2 | 156.51208 | 1 |
| N | 3 | 2.42123 | 1 | 5.51098   | 2 |
| H | 1 | 1.08350 | 2 | 119.34866 | 3 |
| H | 1 | 1.08390 | 2 | 120.67692 | 3 |
| H | 3 | 1.20446 | 2 | 138.10287 | 1 |

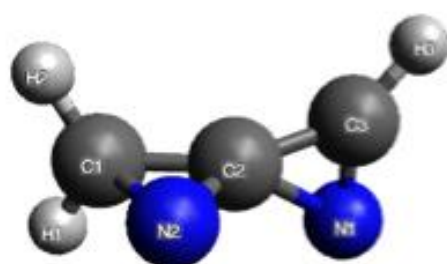

|   |   |         |   |           |   |
|---|---|---------|---|-----------|---|
| C |   |         |   |           |   |
| C | 1 | 1.44423 |   |           |   |
| C | 2 | 1.43748 | 1 | 151.57235 |   |
| N | 3 | 1.24464 | 2 | 77.02147  | 1 |
| N | 2 | 1.33297 | 1 | 66.41235  | 3 |
| H | 1 | 1.08448 | 2 | 120.41796 | 3 |
| H | 1 | 1.08518 | 2 | 120.74992 | 3 |
| H | 3 | 1.08581 | 2 | 144.09187 | 1 |

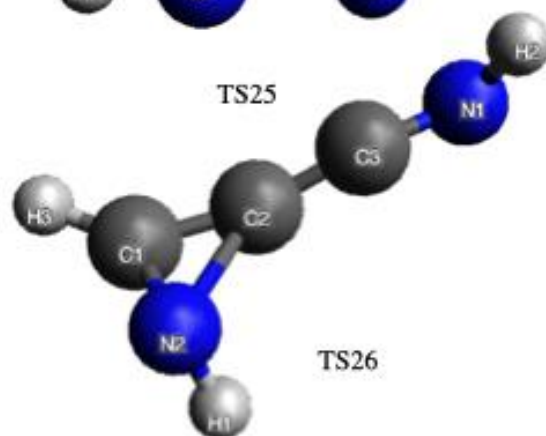

|   |   |         |   |           |   |
|---|---|---------|---|-----------|---|
| C |   |         |   |           |   |
| C | 1 | 1.33717 |   |           |   |
| C | 2 | 1.29521 | 1 | 163.97417 |   |
| N | 3 | 1.23026 | 2 | 164.58603 | 1 |
| N | 1 | 1.38040 | 2 | 84.16921  | 3 |
| H | 5 | 1.01711 | 1 | 111.54274 | 2 |
| H | 4 | 1.01798 | 3 | 118.51204 | 2 |
| H | 1 | 1.07977 | 2 | 139.46696 | 3 |

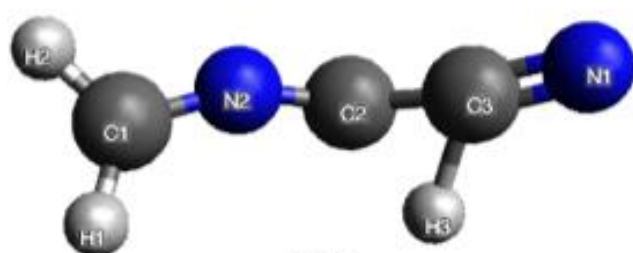

|   |   |         |   |           |   |
|---|---|---------|---|-----------|---|
| C |   |         |   |           |   |
| C | 1 | 2.47375 |   |           |   |
| C | 2 | 1.37226 | 1 | 133.91971 |   |
| N | 3 | 1.20568 | 2 | 166.64930 | 1 |
| N | 2 | 1.25351 | 1 | 10.46144  | 3 |
| H | 1 | 1.08735 | 2 | 111.06302 | 3 |
| H | 1 | 1.08329 | 2 | 129.58539 | 3 |
| H | 3 | 1.33028 | 2 | 65.87033  | 1 |

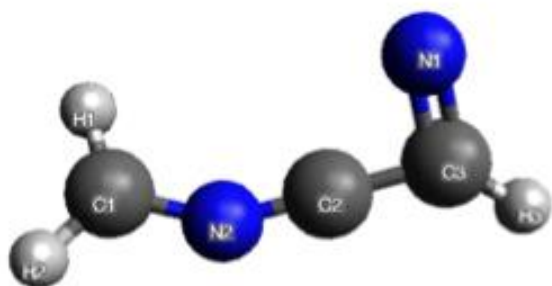

TS28

|   |   |         |   |           |   |           |
|---|---|---------|---|-----------|---|-----------|
| C |   |         |   |           |   |           |
| C | 1 | 2.43962 |   |           |   |           |
| C | 2 | 1.37496 | 1 | 164.65890 |   |           |
| N | 3 | 1.27319 | 2 | 90.11722  | 1 | 30.64017  |
| N | 2 | 1.21191 | 1 | 14.88483  | 3 | 183.74737 |
| H | 1 | 1.08302 | 2 | 106.77224 | 3 | 9.81281   |
| H | 1 | 1.07878 | 2 | 132.22597 | 3 | 192.24423 |
| H | 3 | 1.09330 | 2 | 134.89548 | 1 | 215.92282 |

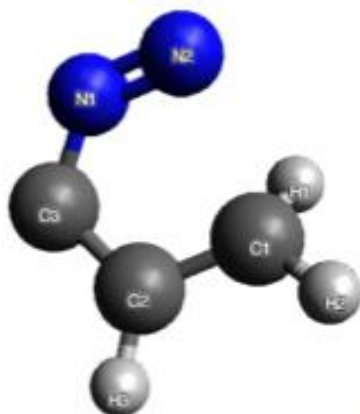

TS29

|   |   |         |   |           |   |           |
|---|---|---------|---|-----------|---|-----------|
| C |   |         |   |           |   |           |
| C | 1 | 1.41068 |   |           |   |           |
| H | 1 | 1.08736 | 2 | 119.47961 |   |           |
| H | 1 | 1.08395 | 2 | 119.66619 | 3 | 212.30124 |
| C | 2 | 1.37492 | 1 | 115.76960 | 3 | 304.75880 |
| H | 2 | 1.08123 | 1 | 121.98380 | 3 | 128.82835 |
| N | 5 | 1.31623 | 2 | 110.96198 | 1 | 348.88146 |
| N | 7 | 1.18935 | 5 | 129.14424 | 2 | 357.98211 |

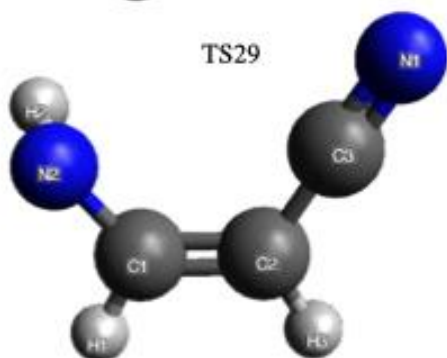

TS30

|   |   |         |   |           |   |           |
|---|---|---------|---|-----------|---|-----------|
| C |   |         |   |           |   |           |
| C | 1 | 1.34283 |   |           |   |           |
| H | 1 | 1.09120 | 2 | 118.57216 |   |           |
| H | 1 | 2.00656 | 2 | 124.19343 | 3 | 208.24513 |
| C | 2 | 1.41917 | 1 | 123.21496 | 3 | 180.65307 |
| H | 2 | 1.07988 | 1 | 119.42194 | 3 | 0.79130   |
| N | 2 | 2.57264 | 1 | 123.61637 | 3 | 180.40641 |
| N | 4 | 1.02436 | 1 | 39.25050  | 2 | 253.33191 |

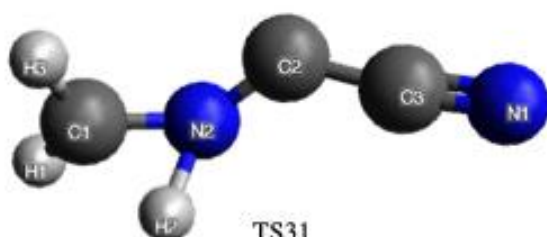

TS31

|   |   |         |   |           |   |           |
|---|---|---------|---|-----------|---|-----------|
| C |   |         |   |           |   |           |
| C | 1 | 2.44341 |   |           |   |           |
| H | 1 | 1.07890 | 2 | 135.07751 |   |           |
| H | 1 | 1.43349 | 2 | 64.96479  | 3 | 72.80257  |
| C | 2 | 1.37716 | 1 | 147.08661 | 3 | 278.79085 |
| H | 1 | 1.08436 | 2 | 98.82989  | 3 | 206.31635 |
| N | 5 | 1.16378 | 2 | 172.73713 | 1 | 219.64545 |
| N | 4 | 1.20226 | 1 | 62.53729  | 2 | 340.14257 |

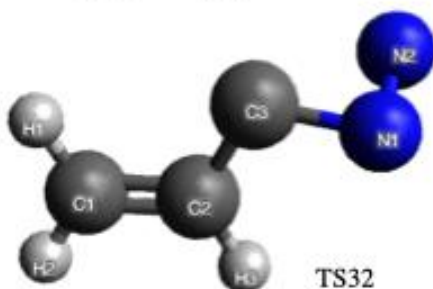

TS32

|   |   |         |   |           |   |           |
|---|---|---------|---|-----------|---|-----------|
| C |   |         |   |           |   |           |
| C | 1 | 1.34340 |   |           |   |           |
| H | 1 | 1.08158 | 2 | 120.14207 |   |           |
| H | 1 | 1.08208 | 2 | 121.75567 | 3 | 181.18934 |
| C | 2 | 1.43936 | 1 | 118.25113 | 3 | 4.35331   |
| H | 2 | 1.08849 | 1 | 120.18484 | 3 | 179.92967 |
| N | 5 | 1.44465 | 2 | 109.99959 | 1 | 173.98350 |
| N | 7 | 1.18956 | 5 | 89.40658  | 2 | 115.55562 |

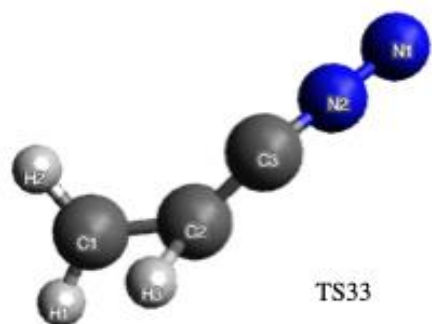

|   |   |         |   |           |   |           |
|---|---|---------|---|-----------|---|-----------|
| C |   |         |   |           |   |           |
| C | 1 | 1.38428 |   |           |   |           |
| H | 1 | 1.08220 | 2 | 119.50724 |   |           |
| H | 1 | 1.09011 | 2 | 123.34932 | 3 | 184.99898 |
| C | 2 | 1.32073 | 1 | 139.40174 | 3 | 185.14492 |
| H | 2 | 1.25570 | 1 | 63.39739  | 3 | 291.46121 |
| N | 5 | 2.40206 | 2 | 147.55099 | 1 | 244.60641 |
| N | 2 | 2.44953 | 1 | 143.89641 | 3 | 158.84284 |

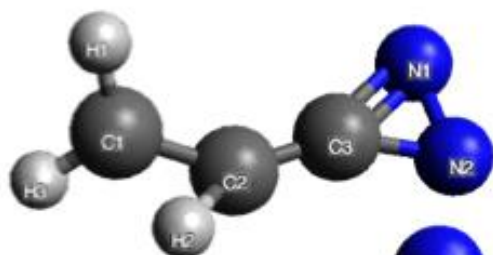

|   |   |         |   |           |   |           |
|---|---|---------|---|-----------|---|-----------|
| C |   |         |   |           |   |           |
| C | 1 | 1.42854 |   |           |   |           |
| H | 1 | 1.08502 | 2 | 121.95262 |   |           |
| H | 2 | 1.28369 | 1 | 59.13994  | 3 | 106.26151 |
| C | 2 | 1.29162 | 1 | 145.93799 | 3 | 336.06896 |
| H | 1 | 1.08078 | 2 | 118.62080 | 3 | 167.97960 |
| N | 5 | 1.44335 | 2 | 155.38748 | 1 | 323.44020 |
| N | 7 | 1.25294 | 5 | 61.95042  | 2 | 185.23931 |

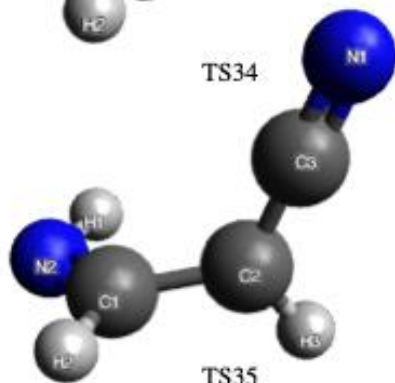

|   |   |         |   |           |   |           |
|---|---|---------|---|-----------|---|-----------|
| C |   |         |   |           |   |           |
| C | 1 | 1.48795 |   |           |   |           |
| C | 2 | 1.37967 | 1 | 122.25549 |   |           |
| N | 2 | 2.54528 | 1 | 122.04985 | 3 | 359.95716 |
| N | 1 | 1.26448 | 2 | 125.34692 | 3 | 91.39238  |
| H | 5 | 1.02208 | 1 | 111.87746 | 2 | 358.65095 |
| H | 1 | 1.09178 | 2 | 116.57792 | 3 | 270.26839 |
| H | 2 | 1.08314 | 1 | 119.17416 | 3 | 178.66512 |

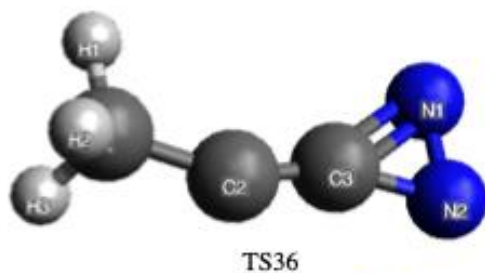

|   |   |         |   |           |   |           |
|---|---|---------|---|-----------|---|-----------|
| C |   |         |   |           |   |           |
| C | 1 | 1.45716 |   |           |   |           |
| H | 1 | 1.09573 | 2 | 111.24704 |   |           |
| H | 1 | 1.09141 | 2 | 111.13621 | 3 | 239.92627 |
| C | 2 | 1.24826 | 1 | 156.13001 | 3 | 0.03658   |
| H | 1 | 1.09141 | 2 | 111.13656 | 3 | 120.07232 |
| N | 5 | 1.56818 | 2 | 152.34007 | 1 | 0.00270   |
| N | 7 | 1.23334 | 5 | 58.46008  | 2 | 179.99929 |

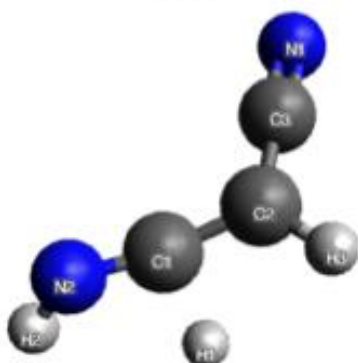

|   |   |         |   |           |   |           |
|---|---|---------|---|-----------|---|-----------|
| C |   |         |   |           |   |           |
| C | 1 | 1.34083 |   |           |   |           |
| H | 1 | 1.94348 | 2 | 91.59020  |   |           |
| H | 1 | 1.92656 | 2 | 169.93413 | 3 | 343.22737 |
| C | 2 | 1.41000 | 1 | 121.86816 | 3 | 99.02638  |
| H | 2 | 1.08162 | 1 | 118.59585 | 3 | 285.56284 |
| N | 2 | 2.56458 | 1 | 122.51921 | 3 | 99.14236  |
| N | 4 | 1.01521 | 1 | 33.07617  | 2 | 187.19601 |



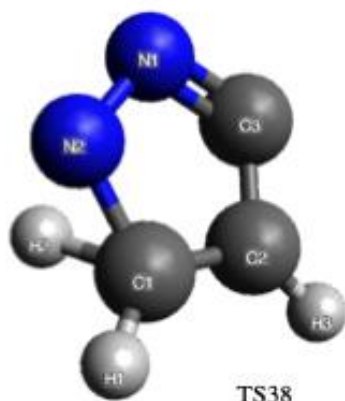

|   |   |         |   |           |   |           |
|---|---|---------|---|-----------|---|-----------|
| C |   |         |   |           |   |           |
| C | 1 | 1.40380 |   |           |   |           |
| H | 1 | 1.07990 | 2 | 130.42058 |   |           |
| H | 1 | 1.26701 | 2 | 112.81397 | 3 | 223.98888 |
| C | 2 | 1.38088 | 1 | 101.73654 | 3 | 196.41329 |
| H | 2 | 1.07421 | 1 | 128.65997 | 3 | 16.35933  |
| N | 5 | 1.31100 | 2 | 115.55170 | 1 | 358.44179 |
| N | 4 | 1.31937 | 1 | 68.56146  | 2 | 261.98088 |

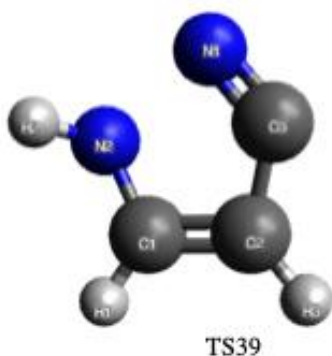

|   |   |         |   |           |   |           |
|---|---|---------|---|-----------|---|-----------|
| C |   |         |   |           |   |           |
| C | 1 | 1.35984 |   |           |   |           |
| H | 1 | 1.08303 | 2 | 126.05470 |   |           |
| H | 1 | 2.05344 | 2 | 128.21388 | 3 | 157.74062 |
| C | 2 | 1.42849 | 1 | 103.75392 | 3 | 184.42844 |
| H | 2 | 1.07372 | 1 | 128.32754 | 3 | 4.82093   |
| N | 5 | 1.20365 | 2 | 127.69943 | 1 | 359.23589 |
| N | 4 | 1.01798 | 1 | 36.08000  | 2 | 66.81549  |

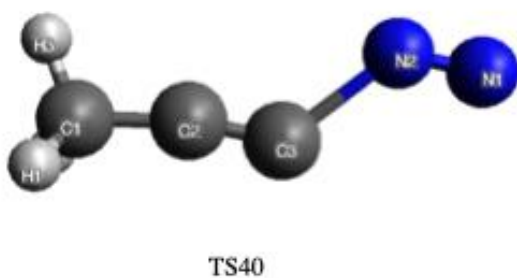

|   |   |         |   |           |   |           |
|---|---|---------|---|-----------|---|-----------|
| C |   |         |   |           |   |           |
| C | 1 | 1.45247 |   |           |   |           |
| H | 1 | 1.09106 | 2 | 111.18715 |   |           |
| H | 1 | 1.09092 | 2 | 111.23677 | 3 | 238.87522 |
| C | 2 | 1.22685 | 1 | 168.95885 | 3 | 56.81343  |
| H | 1 | 1.09301 | 2 | 110.22542 | 3 | 119.36682 |
| N | 5 | 2.71997 | 2 | 149.14153 | 1 | 180.10778 |
| N | 7 | 1.10640 | 5 | 31.48954  | 2 | 0.15527   |

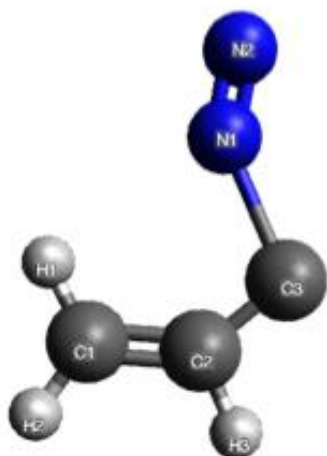

|   |   |         |   |           |   |           |
|---|---|---------|---|-----------|---|-----------|
| C |   |         |   |           |   |           |
| C | 1 | 1.38236 |   |           |   |           |
| H | 1 | 1.08028 | 2 | 120.76898 |   |           |
| H | 1 | 1.07898 | 2 | 121.09228 | 3 | 180.00000 |
| C | 2 | 1.36104 | 1 | 136.42409 | 3 | 0.00000   |
| H | 2 | 1.09598 | 1 | 118.17284 | 3 | 180.00000 |
| N | 5 | 1.91814 | 2 | 105.84406 | 1 | 0.00000   |
| N | 7 | 1.09636 | 5 | 146.70057 | 2 | 180.00000 |

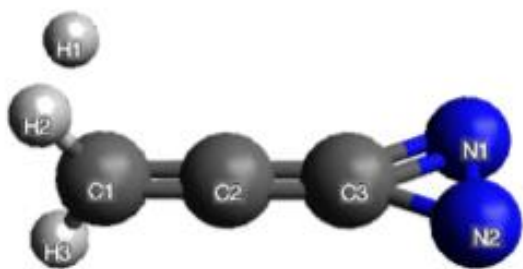

TS42

|   |   |         |   |           |           |
|---|---|---------|---|-----------|-----------|
| C |   |         |   |           |           |
| C | 1 | 1.31125 |   |           |           |
| H | 1 | 2.36776 | 2 | 105.39080 |           |
| H | 1 | 1.08308 | 2 | 121.39427 | 3         |
| C | 3 | 3.92659 | 1 | 39.44688  | 2         |
| H | 1 | 1.08308 | 2 | 121.39430 | 3         |
| N | 5 | 1.42313 | 2 | 154.15214 | 1         |
| N | 7 | 1.24170 | 5 | 64.09649  | 2         |
|   |   |         |   |           | 180.00000 |

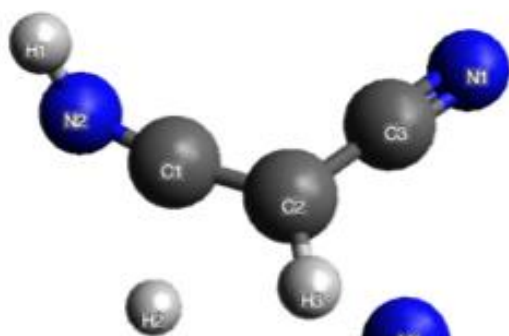

TS43

|   |   |         |   |           |           |
|---|---|---------|---|-----------|-----------|
| C |   |         |   |           |           |
| C | 1 | 1.34050 |   |           |           |
| C | 2 | 1.41212 | 1 | 120.94722 |           |
| N | 2 | 2.56687 | 1 | 121.54433 | 3         |
| N | 1 | 1.21259 | 2 | 168.93651 | 3         |
| H | 5 | 1.01769 | 1 | 118.47376 | 2         |
| H | 1 | 1.88183 | 2 | 90.14706  | 3         |
| H | 2 | 1.07982 | 1 | 119.72042 | 3         |
|   |   |         |   |           | 183.80550 |

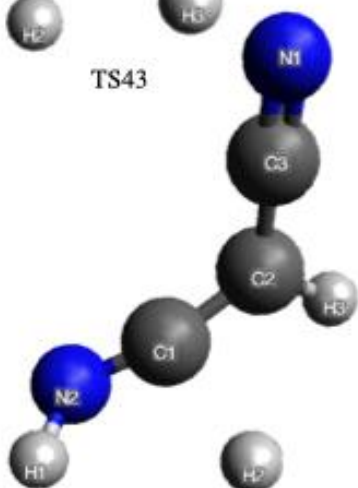

TS45

|   |   |         |   |           |           |
|---|---|---------|---|-----------|-----------|
| C |   |         |   |           |           |
| C | 1 | 1.34083 |   |           |           |
| C | 2 | 1.41000 | 1 | 121.86837 |           |
| N | 2 | 2.56457 | 1 | 122.51960 | 3         |
| N | 1 | 1.21015 | 2 | 162.69606 | 3         |
| H | 5 | 1.01521 | 1 | 119.67721 | 2         |
| H | 1 | 1.94350 | 2 | 91.58954  | 3         |
| H | 2 | 1.08162 | 1 | 118.59587 | 3         |
|   |   |         |   |           | 173.46428 |

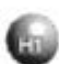

TS44

|   |   |         |   |           |           |
|---|---|---------|---|-----------|-----------|
| C |   |         |   |           |           |
| C | 1 | 1.39745 |   |           |           |
| H | 1 | 3.86064 | 2 | 179.97438 |           |
| H | 1 | 1.07929 | 2 | 128.64791 | 3         |
| C | 2 | 1.46762 | 1 | 101.78561 | 3         |
| H | 2 | 1.07645 | 1 | 130.22417 | 3         |
| N | 5 | 1.24227 | 2 | 114.97825 | 1         |
| N | 1 | 1.32624 | 2 | 111.85875 | 3         |
|   |   |         |   |           | 352.34426 |

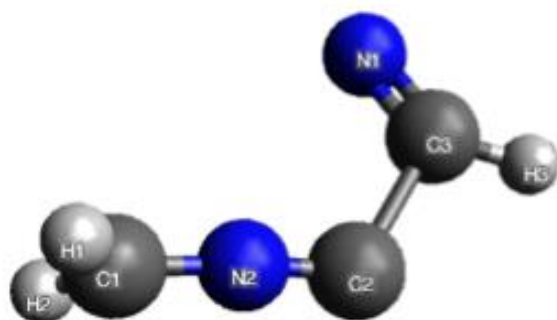

TS46

|   |   |         |   |           |   |
|---|---|---------|---|-----------|---|
| C |   |         |   |           |   |
| C | 1 | 2.49264 |   |           |   |
| C | 2 | 1.82020 | 1 | 124.17355 |   |
| N | 3 | 1.18981 | 2 | 114.11341 | 1 |
| N | 3 | 2.66457 | 1 | 10.40854  | 2 |
| H | 1 | 1.07971 | 2 | 119.50227 | 3 |
| H | 1 | 1.07976 | 2 | 118.97530 | 3 |
| H | 3 | 1.07782 | 2 | 105.38979 | 1 |

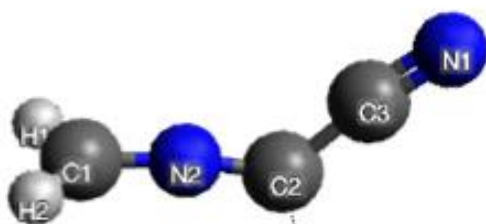

TS47

|   |   |         |   |           |   |
|---|---|---------|---|-----------|---|
| C |   |         |   |           |   |
| C | 1 | 2.47853 |   |           |   |
| C | 2 | 1.39396 | 1 | 132.09059 |   |
| N | 3 | 1.15792 | 2 | 172.72636 | 1 |
| N | 3 | 2.35394 | 1 | 7.23860   | 2 |
| H | 1 | 1.08137 | 2 | 119.50115 | 3 |
| H | 1 | 1.08137 | 2 | 119.50113 | 3 |
| H | 2 | 4.73075 | 1 | 110.49064 | 3 |

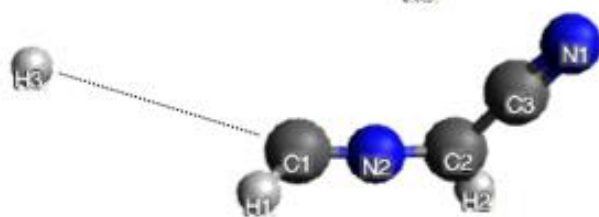

TS48

|   |   |         |   |           |   |
|---|---|---------|---|-----------|---|
| C |   |         |   |           |   |
| C | 1 | 2.48309 |   |           |   |
| C | 2 | 1.41155 | 1 | 121.19787 |   |
| N | 2 | 2.56644 | 1 | 122.03185 | 3 |
| N | 3 | 2.35523 | 1 | 10.43597  | 2 |
| H | 1 | 1.08464 | 2 | 129.91015 | 3 |
| H | 2 | 1.07987 | 1 | 118.44945 | 3 |
| H | 6 | 4.51344 | 1 | 85.50914  | 2 |

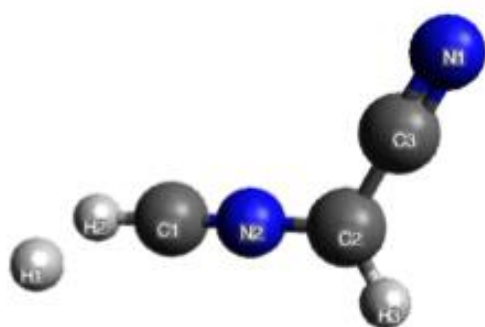

TS49

|   |   |         |   |           |   |
|---|---|---------|---|-----------|---|
| C |   |         |   |           |   |
| C | 1 | 2.47873 |   |           |   |
| C | 2 | 1.40191 | 1 | 120.37993 |   |
| N | 2 | 2.55943 | 1 | 120.97400 | 3 |
| N | 3 | 2.35655 | 1 | 10.03183  | 2 |
| H | 1 | 2.37232 | 2 | 106.37280 | 3 |
| H | 1 | 1.06263 | 2 | 171.95290 | 3 |
| H | 2 | 1.07755 | 1 | 117.58245 | 3 |

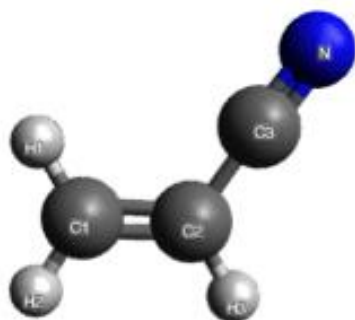

$C_3H_7N$

|   |   |         |   |           |   |
|---|---|---------|---|-----------|---|
| C |   |         |   |           |   |
| C | 1 | 1.33116 |   |           |   |
| H | 1 | 1.08074 | 2 | 121.75956 |   |
| H | 1 | 1.08038 | 2 | 120.57518 | 3 |
| C | 2 | 1.42622 | 1 | 123.13455 | 3 |
| H | 2 | 1.08274 | 1 | 121.21305 | 3 |
| N | 2 | 2.57849 | 1 | 123.75543 | 3 |

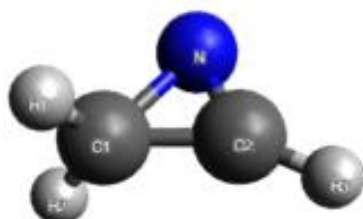

${}^1c\text{-CH}_2(\text{N})\text{CH}$

|   |   |         |   |           |   |
|---|---|---------|---|-----------|---|
| C |   |         |   |           |   |
| C | 1 | 1.44757 |   |           |   |
| N | 2 | 1.24616 | 1 | 69.65658  |   |
| H | 1 | 1.08314 | 2 | 120.63235 | 3 |
| H | 1 | 1.08313 | 2 | 120.61501 | 3 |
| H | 2 | 1.08061 | 1 | 151.43544 | 3 |

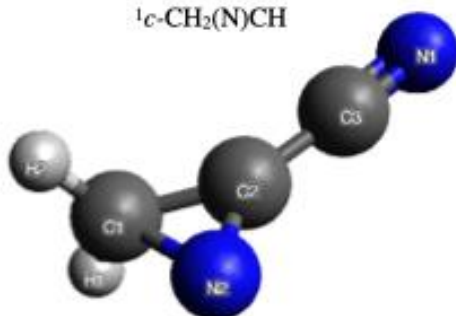

${}^1c\text{-CH}_2(\text{N})\text{CCN}$

|   |   |         |   |           |   |
|---|---|---------|---|-----------|---|
| C |   |         |   |           |   |
| C | 1 | 1.44979 |   |           |   |
| C | 2 | 1.40599 | 1 | 150.39673 |   |
| N | 2 | 2.55738 | 1 | 149.05293 | 3 |
| N | 2 | 1.25433 | 1 | 68.90462  | 3 |
| H | 1 | 1.08243 | 2 | 119.93940 | 3 |
| H | 1 | 1.08236 | 2 | 120.00372 | 3 |

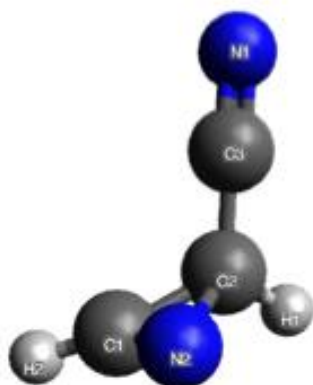

${}^1c\text{-CH}(\text{N})\text{CHCN}$

|   |   |         |   |           |   |
|---|---|---------|---|-----------|---|
| C |   |         |   |           |   |
| C | 1 | 1.45579 |   |           |   |
| C | 2 | 1.43726 | 1 | 121.32962 |   |
| N | 2 | 2.58848 | 1 | 121.57853 | 3 |
| N | 1 | 1.24229 | 2 | 69.87321  | 3 |
| H | 2 | 1.08195 | 1 | 120.50129 | 3 |
| H | 1 | 1.08005 | 2 | 149.20540 | 3 |

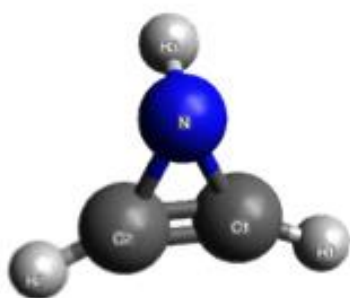

$^1c\text{-CH(NH)CH}$

|   |   |         |   |           |   |           |
|---|---|---------|---|-----------|---|-----------|
| C |   |         |   |           |   |           |
| C | 1 | 1.26892 |   |           |   |           |
| N | 2 | 1.51635 | 1 | 65.26729  |   |           |
| H | 1 | 1.07113 | 2 | 156.29394 | 3 | 168.99135 |
| H | 2 | 1.07114 | 1 | 156.29124 | 3 | 190.94153 |
| H | 3 | 1.02345 | 2 | 107.78894 | 1 | 98.43148  |

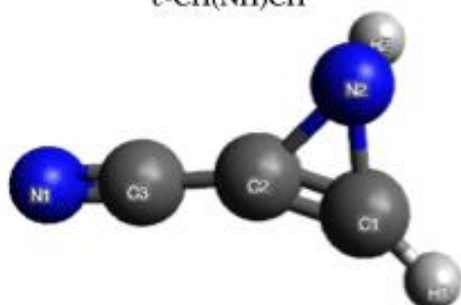

$^1c\text{-CH(NH)CCN}$

|   |   |         |   |           |   |           |
|---|---|---------|---|-----------|---|-----------|
| C |   |         |   |           |   |           |
| C | 1 | 1.27748 |   |           |   |           |
| C | 2 | 1.38034 | 1 | 158.14962 |   |           |
| N | 2 | 2.53595 | 1 | 158.77554 | 3 | 359.07492 |
| N | 1 | 1.47473 | 2 | 68.00948  | 3 | 189.22702 |
| H | 1 | 1.07388 | 2 | 153.37110 | 3 | 3.00824   |
| H | 5 | 1.02396 | 1 | 108.46518 | 2 | 261.73341 |

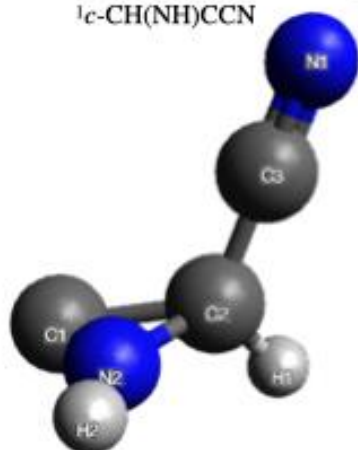

$^1c\text{-C(NH)CHCN}$

|   |   |         |   |           |   |           |
|---|---|---------|---|-----------|---|-----------|
| C |   |         |   |           |   |           |
| C | 1 | 1.61315 |   |           |   |           |
| C | 2 | 1.43329 | 1 | 119.71668 |   |           |
| N | 2 | 2.58520 | 1 | 119.97382 | 3 | 359.69485 |
| N | 1 | 1.27313 | 2 | 57.84089  | 3 | 255.59851 |
| H | 2 | 1.08077 | 1 | 118.07308 | 3 | 208.40222 |
| H | 5 | 1.01231 | 1 | 144.15590 | 2 | 176.88069 |

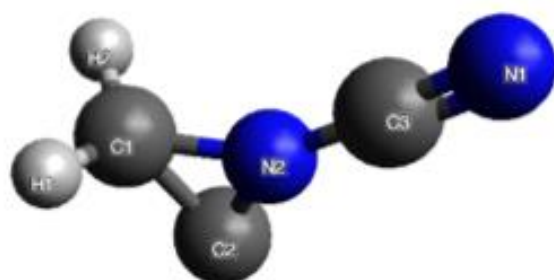

$^1c\text{-CH}_2(\text{NCN})\text{C}$

|   |   |         |   |           |   |           |
|---|---|---------|---|-----------|---|-----------|
| C |   |         |   |           |   |           |
| C | 1 | 1.55299 |   |           |   |           |
| C | 2 | 2.52120 | 1 | 76.93947  |   |           |
| N | 3 | 1.15348 | 2 | 165.28649 | 1 | 179.99707 |
| N | 2 | 1.30617 | 1 | 59.87601  | 3 | 359.99718 |
| H | 1 | 1.08252 | 2 | 118.84789 | 3 | 257.39776 |
| H | 1 | 1.08249 | 2 | 118.88616 | 3 | 102.60235 |

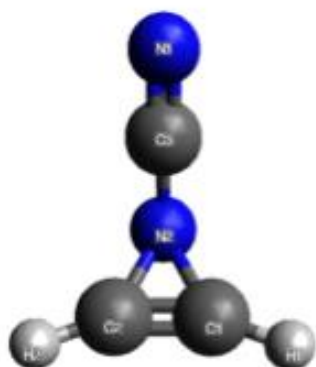

$^1c\text{-CH(NCN)CH}$

|   |   |         |   |           |   |           |
|---|---|---------|---|-----------|---|-----------|
| C |   |         |   |           |   |           |
| C | 1 | 1.26626 |   |           |   |           |
| C | 2 | 2.42896 | 1 | 74.91384  |   |           |
| N | 3 | 1.15538 | 2 | 150.06958 | 1 | 241.95124 |
| N | 3 | 1.35964 | 2 | 34.81413  | 1 | 67.13365  |
| H | 1 | 1.07119 | 2 | 158.90927 | 3 | 154.05621 |
| H | 2 | 1.07121 | 1 | 158.87595 | 3 | 205.85137 |

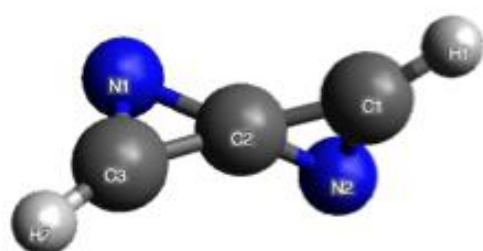

$^1c\text{-CH(N)CCHN}$

|   |   |         |   |           |   |           |
|---|---|---------|---|-----------|---|-----------|
| C |   |         |   |           |   |           |
| C | 1 | 1.40977 |   |           |   |           |
| C | 2 | 1.40973 | 1 | 156.41573 |   |           |
| N | 3 | 1.27159 | 2 | 67.02909  | 1 | 133.10070 |
| N | 1 | 1.27167 | 2 | 67.03154  | 3 | 133.31860 |
| H | 1 | 1.08360 | 2 | 155.75104 | 3 | 311.63757 |
| H | 3 | 1.08355 | 2 | 155.64791 | 1 | 311.14521 |

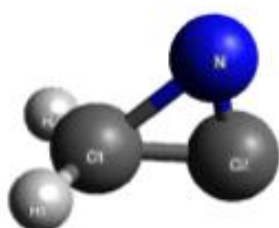

$c\text{-CH}_2(\text{N})\text{C}$

|   |   |         |   |           |   |           |
|---|---|---------|---|-----------|---|-----------|
| C |   |         |   |           |   |           |
| C | 1 | 1.49406 |   |           |   |           |
| N | 2 | 1.21141 | 1 | 73.94261  |   |           |
| H | 1 | 1.07956 | 2 | 119.98477 | 3 | 263.58621 |
| H | 1 | 1.07956 | 2 | 119.98477 | 3 | 96.41379  |

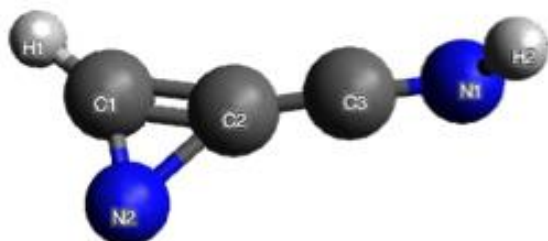

$^1c\text{-CH(N)CCNH}$

|   |   |         |   |           |   |           |
|---|---|---------|---|-----------|---|-----------|
| C |   |         |   |           |   |           |
| C | 1 | 1.39593 |   |           |   |           |
| C | 2 | 1.27926 | 1 | 164.53064 |   |           |
| N | 3 | 1.23446 | 2 | 171.39859 | 1 | 257.31372 |
| N | 1 | 1.25832 | 2 | 70.47377  | 3 | 193.78538 |
| H | 1 | 1.08162 | 2 | 149.91244 | 3 | 14.14489  |
| H | 4 | 1.02061 | 3 | 114.62383 | 2 | 179.35090 |

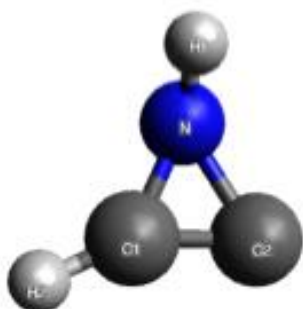

c-CH(NH)C

|   |   |         |   |           |             |
|---|---|---------|---|-----------|-------------|
| C |   |         |   |           |             |
| C | 1 | 1.35584 |   |           |             |
| N | 1 | 1.36149 | 2 | 66.65354  |             |
| H | 3 | 1.01774 | 1 | 130.23113 | 2 247.92021 |
| H | 1 | 1.07428 | 2 | 155.01873 | 3 182.68779 |

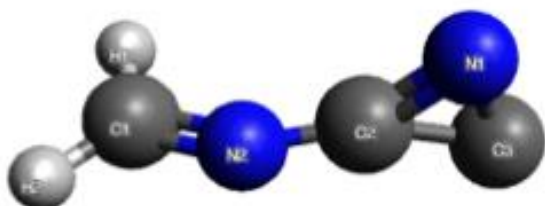

<sup>1</sup>c-CH<sub>2</sub>NC(N)C

|   |   |         |   |           |             |
|---|---|---------|---|-----------|-------------|
| C |   |         |   |           |             |
| C | 1 | 2.43211 |   |           |             |
| C | 2 | 1.44644 | 1 | 157.18401 |             |
| N | 3 | 1.32526 | 2 | 57.84292  | 1 153.58133 |
| N | 2 | 1.25621 | 1 | 15.31859  | 3 241.97085 |
| H | 1 | 1.08626 | 2 | 106.38601 | 3 295.23277 |
| H | 1 | 1.08292 | 2 | 134.42274 | 3 114.28664 |

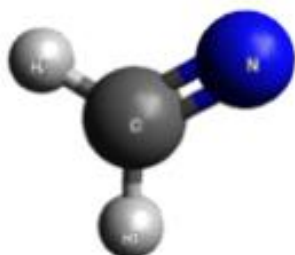

H<sub>2</sub>CN

|   |   |         |   |           |             |
|---|---|---------|---|-----------|-------------|
| C |   |         |   |           |             |
| N | 1 | 1.23794 |   |           |             |
| H | 1 | 1.09755 | 2 | 121.50867 |             |
| H | 1 | 1.09731 | 2 | 121.56479 | 3 179.99825 |

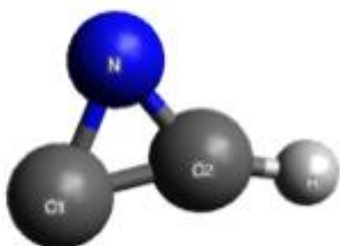

<sup>1</sup>c-C(N)CH

|   |   |         |   |           |             |
|---|---|---------|---|-----------|-------------|
| C |   |         |   |           |             |
| C | 1 | 1.39644 |   |           |             |
| N | 2 | 1.29057 | 1 | 62.81549  |             |
| H | 2 | 1.07879 | 1 | 158.97676 | 3 179.98521 |

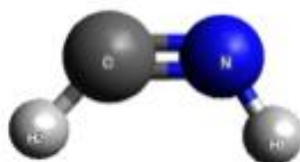

HCNH

|   |   |         |   |           |           |
|---|---|---------|---|-----------|-----------|
| C |   |         |   |           |           |
| N | 1 | 1.21760 |   |           |           |
| H | 2 | 1.02522 | 1 | 122.72699 |           |
| H | 1 | 1.09688 | 2 | 133.98864 | 3 0.00000 |

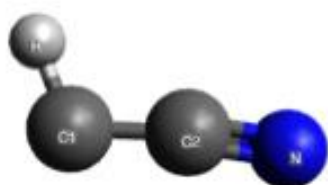

<sup>1</sup>HCCN

|   |   |         |   |           |             |
|---|---|---------|---|-----------|-------------|
| C |   |         |   |           |             |
| C | 1 | 1.36792 |   |           |             |
| N | 2 | 1.17415 | 1 | 172.29129 |             |
| H | 1 | 1.09503 | 2 | 112.11024 | 3 180.02822 |

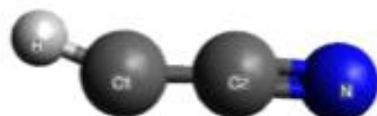

<sup>3</sup>HCCN

|   |   |         |   |           |             |
|---|---|---------|---|-----------|-------------|
| C |   |         |   |           |             |
| C | 1 | 1.29425 |   |           |             |
| N | 2 | 1.19838 | 1 | 176.18673 |             |
| H | 1 | 1.06573 | 2 | 157.71586 | 3 180.03147 |

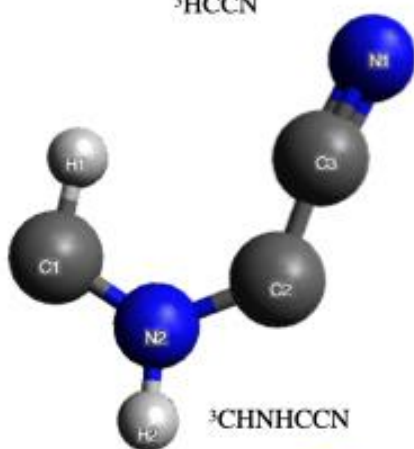

<sup>3</sup>CHNHCCN

|   |   |         |   |           |             |
|---|---|---------|---|-----------|-------------|
| C |   |         |   |           |             |
| C | 1 | 2.39168 |   |           |             |
| C | 2 | 1.35405 | 1 | 103.99304 |             |
| N | 3 | 1.17287 | 2 | 172.46910 | 1 180.02512 |
| N | 1 | 1.31772 | 2 | 28.03981  | 3 179.97611 |
| H | 1 | 1.09683 | 2 | 83.46943  | 3 359.96548 |
| H | 5 | 1.01182 | 1 | 118.79414 | 2 180.00277 |

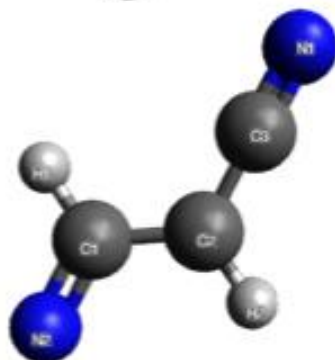

<sup>3</sup>CHNCHCN

|   |   |         |   |           |             |
|---|---|---------|---|-----------|-------------|
| C |   |         |   |           |             |
| C | 1 | 1.41820 |   |           |             |
| C | 2 | 1.39589 | 1 | 122.13182 |             |
| N | 2 | 2.55565 | 1 | 122.26147 | 3 0.00002   |
| N | 1 | 1.27850 | 2 | 123.08707 | 3 179.99999 |
| H | 1 | 1.09487 | 2 | 118.56283 | 3 0.00007   |
| H | 2 | 1.08128 | 1 | 119.44159 | 3 179.99993 |

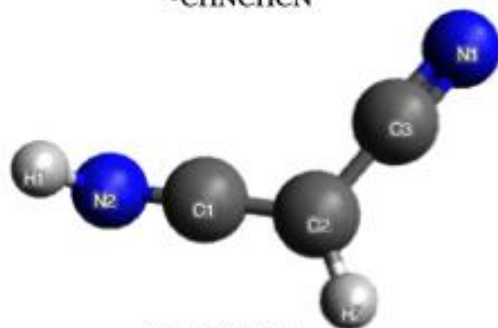

<sup>1</sup>HNCCHCN

|   |   |         |   |           |             |
|---|---|---------|---|-----------|-------------|
| C |   |         |   |           |             |
| C | 1 | 1.32092 |   |           |             |
| C | 2 | 1.41538 | 1 | 122.18906 |             |
| N | 2 | 2.56874 | 1 | 122.92746 | 3 0.07214   |
| N | 1 | 1.20617 | 2 | 173.73335 | 3 99.66556  |
| H | 5 | 1.01642 | 1 | 120.18978 | 2 171.50080 |
| H | 2 | 1.08196 | 1 | 118.71690 | 3 178.82558 |



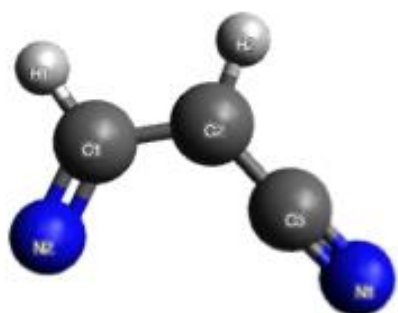

<sup>3</sup>NCHCHCN

|   |   |         |   |           |   |           |
|---|---|---------|---|-----------|---|-----------|
| C |   |         |   |           |   |           |
| C | 1 | 1.41846 |   |           |   |           |
| C | 2 | 1.39911 | 1 | 123.69764 |   |           |
| N | 2 | 2.55704 | 1 | 124.56582 | 3 | 359.99993 |
| N | 1 | 1.27901 | 2 | 125.50992 | 3 | 359.99993 |
| H | 1 | 1.09499 | 2 | 116.86370 | 3 | 179.99993 |
| H | 2 | 1.08114 | 1 | 119.04772 | 3 | 180.00007 |

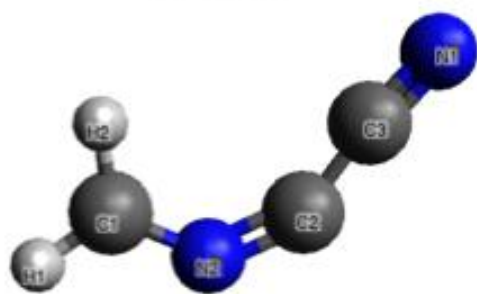

<sup>3</sup>CH<sub>2</sub>NCCN

|   |   |         |   |           |   |           |
|---|---|---------|---|-----------|---|-----------|
| C |   |         |   |           |   |           |
| C | 1 | 2.33501 |   |           |   |           |
| C | 2 | 1.34561 | 1 | 124.26384 |   |           |
| N | 3 | 1.17442 | 2 | 172.23196 | 1 | 180.00085 |
| N | 2 | 1.26859 | 1 | 25.55225  | 3 | 180.00011 |
| H | 1 | 1.08091 | 2 | 143.19965 | 3 | 180.00213 |
| H | 1 | 1.08824 | 2 | 97.00451  | 3 | 359.99857 |

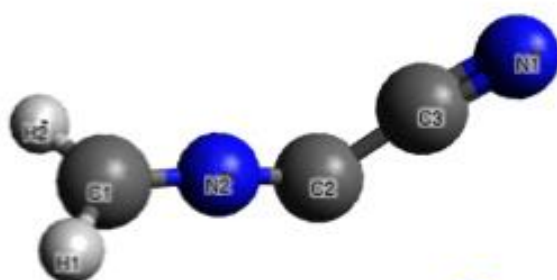

<sup>1</sup>CH<sub>2</sub>NCCN

|   |   |         |   |           |   |           |
|---|---|---------|---|-----------|---|-----------|
| C |   |         |   |           |   |           |
| C | 1 | 2.47862 |   |           |   |           |
| C | 2 | 1.39367 | 1 | 132.21286 |   |           |
| N | 3 | 1.15795 | 2 | 172.71374 | 1 | 180.03762 |
| N | 3 | 2.35472 | 1 | 7.20773   | 2 | 359.94081 |
| H | 1 | 1.08134 | 2 | 119.50762 | 3 | 268.46003 |
| H | 1 | 1.08141 | 2 | 119.47863 | 3 | 91.58547  |

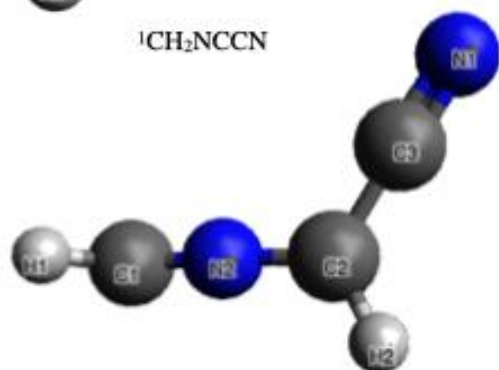

<sup>1</sup>CHNCHCN

|   |   |         |   |           |   |           |
|---|---|---------|---|-----------|---|-----------|
| C |   |         |   |           |   |           |
| C | 1 | 2.48305 |   |           |   |           |
| C | 2 | 1.41159 | 1 | 121.21878 |   |           |
| N | 2 | 2.56648 | 1 | 122.04340 | 3 | 0.00305   |
| N | 3 | 2.35551 | 1 | 10.43332  | 2 | 349.07557 |
| H | 1 | 1.08454 | 2 | 129.91575 | 3 | 267.99654 |
| H | 2 | 1.07988 | 1 | 118.46282 | 3 | 183.94401 |

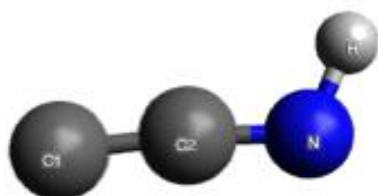

<sup>1</sup>CCNH

|   |   |         |   |           |   |           |
|---|---|---------|---|-----------|---|-----------|
| C |   |         |   |           |   |           |
| C | 1 | 1.31353 |   |           |   |           |
| N | 2 | 1.23870 | 1 | 174.05770 |   |           |
| H | 3 | 1.02583 | 2 | 113.96205 | 1 | 180.49088 |

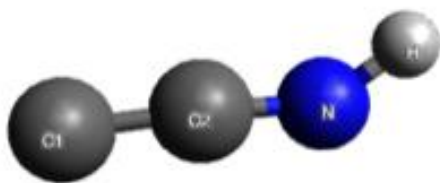

|   |   |         |   |           |   |           |
|---|---|---------|---|-----------|---|-----------|
| C |   |         |   |           |   |           |
| C | 1 | 1.33491 |   |           |   |           |
| N | 2 | 1.20865 | 1 | 174.54877 |   |           |
| H | 3 | 1.00571 | 2 | 137.79861 | 1 | 179.99498 |

<sup>3</sup>CCNH

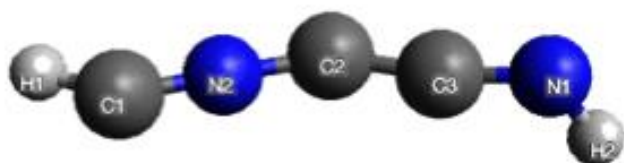

|   |   |         |   |           |   |           |
|---|---|---------|---|-----------|---|-----------|
| C |   |         |   |           |   |           |
| C | 1 | 2.44359 |   |           |   |           |
| C | 2 | 1.27076 | 1 | 151.67337 |   |           |
| N | 3 | 1.22768 | 2 | 171.58546 | 1 | 234.70230 |
| N | 3 | 2.45637 | 2 | 13.78431  | 1 | 0.58631   |
| H | 1 | 1.07240 | 2 | 141.40903 | 3 | 186.20970 |
| H | 4 | 1.01336 | 3 | 119.71047 | 2 | 209.90372 |

<sup>1</sup>CHNCCNH

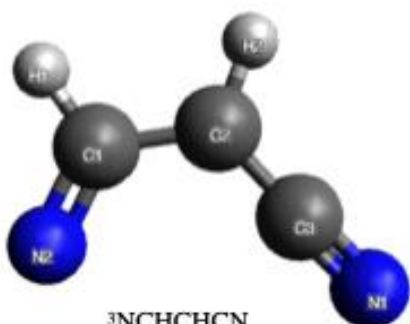

|   |   |         |   |           |   |           |
|---|---|---------|---|-----------|---|-----------|
| C |   |         |   |           |   |           |
| C | 1 | 1.41846 |   |           |   |           |
| C | 2 | 1.39911 | 1 | 123.69764 |   |           |
| N | 2 | 2.55704 | 1 | 124.56582 | 3 | 359.99993 |
| N | 1 | 1.27901 | 2 | 125.50992 | 3 | 359.99993 |
| H | 1 | 1.09499 | 2 | 116.86370 | 3 | 179.99993 |
| H | 2 | 1.08114 | 1 | 119.04772 | 3 | 180.00007 |

<sup>3</sup>NCHCHCN

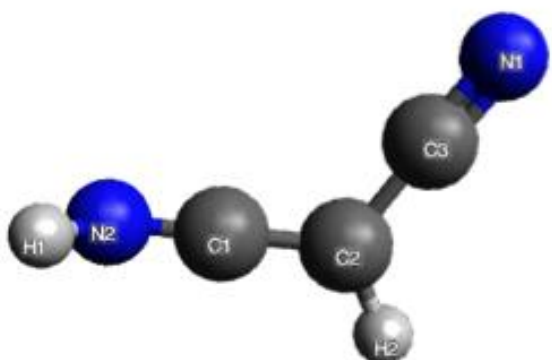

|   |   |         |   |           |   |           |
|---|---|---------|---|-----------|---|-----------|
| C |   |         |   |           |   |           |
| C | 1 | 1.32092 |   |           |   |           |
| C | 2 | 1.41538 | 1 | 122.18906 |   |           |
| N | 2 | 2.56874 | 1 | 122.92746 | 3 | 0.07214   |
| N | 1 | 1.20617 | 2 | 173.73335 | 3 | 99.66556  |
| H | 5 | 1.01642 | 1 | 120.18978 | 2 | 171.50080 |
| H | 2 | 1.08196 | 1 | 118.71690 | 3 | 178.82558 |

<sup>1</sup>NHCCHCN

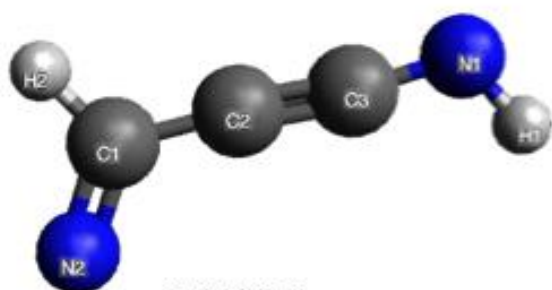

|   |   |         |   |           |   |           |
|---|---|---------|---|-----------|---|-----------|
| C |   |         |   |           |   |           |
| C | 1 | 1.39345 |   |           |   |           |
| C | 2 | 1.25020 | 1 | 175.61171 |   |           |
| N | 3 | 1.24956 | 2 | 172.71029 | 1 | 179.24532 |
| N | 1 | 1.27951 | 2 | 122.64380 | 3 | 0.81057   |
| H | 4 | 1.01910 | 3 | 114.78123 | 2 | 179.99321 |
| H | 1 | 1.09687 | 2 | 119.49238 | 3 | 180.69071 |

<sup>3</sup>NCHCCNH

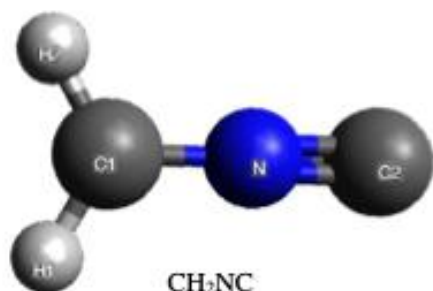

CH<sub>2</sub>NC

|   |   |         |   |           |   |           |
|---|---|---------|---|-----------|---|-----------|
| C |   |         |   |           |   |           |
| C | 1 | 2.51428 |   |           |   |           |
| N | 2 | 1.18182 | 1 | 0.09347   |   |           |
| H | 1 | 1.07856 | 2 | 118.77897 | 3 | 179.69967 |
| H | 1 | 1.07856 | 2 | 119.12869 | 3 | 359.69884 |

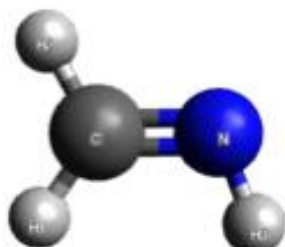

<sup>1</sup>CH<sub>2</sub>NH

|   |   |         |   |           |   |           |
|---|---|---------|---|-----------|---|-----------|
| C |   |         |   |           |   |           |
| N | 1 | 1.26390 |   |           |   |           |
| H | 1 | 1.09345 | 2 | 124.67646 |   |           |
| H | 1 | 1.08904 | 2 | 118.96024 | 3 | 179.97395 |
| H | 2 | 1.02046 | 1 | 111.40702 | 3 | 359.97675 |

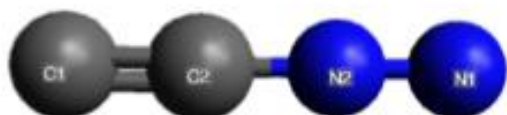

CCNN

|   |   |         |   |           |   |         |
|---|---|---------|---|-----------|---|---------|
| C |   |         |   |           |   |         |
| C | 1 | 1.26282 |   |           |   |         |
| N | 2 | 2.38880 | 1 | 179.97438 |   |         |
| N | 3 | 1.12287 | 2 | 0.02562   | 1 | 0.00000 |

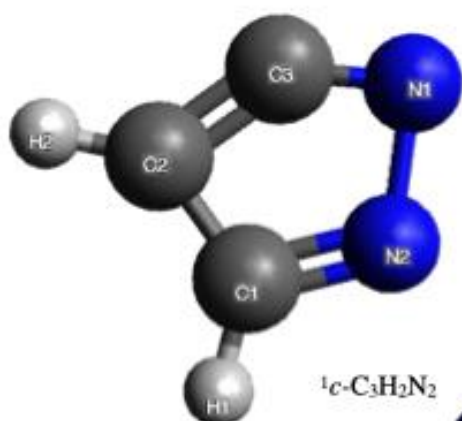

<sup>1</sup>c-C<sub>3</sub>H<sub>2</sub>N<sub>2</sub>

|   |   |         |   |           |   |           |
|---|---|---------|---|-----------|---|-----------|
| C |   |         |   |           |   |           |
| C | 1 | 1.39497 |   |           |   |           |
| H | 1 | 1.07908 | 2 | 130.25993 |   |           |
| C | 2 | 1.37079 | 1 | 90.18834  | 3 | 179.98758 |
| H | 2 | 1.06974 | 1 | 136.97624 | 3 | 0.00634   |
| N | 4 | 1.23482 | 2 | 138.09125 | 1 | 0.00726   |
| N | 1 | 1.36238 | 2 | 111.73532 | 3 | 179.99314 |

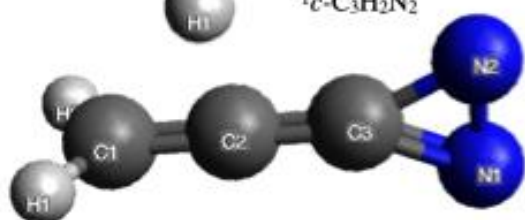

<sup>1</sup>c-CH<sub>2</sub>CC(N)N

|   |   |         |   |           |   |           |
|---|---|---------|---|-----------|---|-----------|
| C |   |         |   |           |   |           |
| C | 1 | 1.30671 |   |           |   |           |
| H | 1 | 1.08359 | 2 | 121.45368 |   |           |
| H | 1 | 1.08367 | 2 | 121.44907 | 3 | 179.92772 |
| C | 3 | 3.27726 | 1 | 42.17991  | 2 | 359.95324 |
| N | 5 | 1.42140 | 2 | 154.04608 | 1 | 26.82282  |
| N | 6 | 1.24275 | 5 | 64.08693  | 2 | 180.07446 |

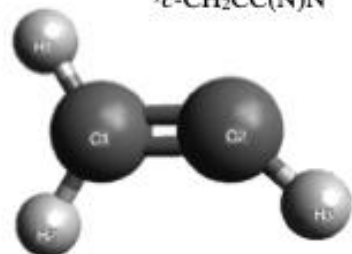

CH<sub>2</sub>CH

|   |   |         |   |           |   |           |
|---|---|---------|---|-----------|---|-----------|
| C |   |         |   |           |   |           |
| C | 1 | 1.30127 |   |           |   |           |
| H | 1 | 1.08577 | 2 | 122.28669 |   |           |
| H | 1 | 1.09129 | 2 | 121.83822 | 3 | 180.06320 |
| H | 2 | 1.07749 | 1 | 138.78445 | 3 | 180.08060 |
